# Supplementary material for: Antiviral Potential of Antillogorgia americana and elisabethae Natural Products against nsp16–nsp10 Complex, nsp13, and nsp14 Proteins of SARS-CoV-2: An In Silico Investigation
Source: MDPI journal article supplement (doi:10.3390/microbiolres14030068), 2023-07-28
Supplement: s1 [file s1]

# Antiviral Potential of *Antillogorgia americana* and *elisabethae* Natural Products against nsp16-nsp10 complex, nsp13, and nsp14 Proteins of SARS-CoV-2: An In silico Investigation

Omkar Pokharkar <sup>1\*</sup>, Hariharan Lakshmanan <sup>2</sup>, Grigory Zyryanov <sup>1,3\*</sup>, and Mikhail Tsurkan <sup>4</sup>

## Supplementary Information

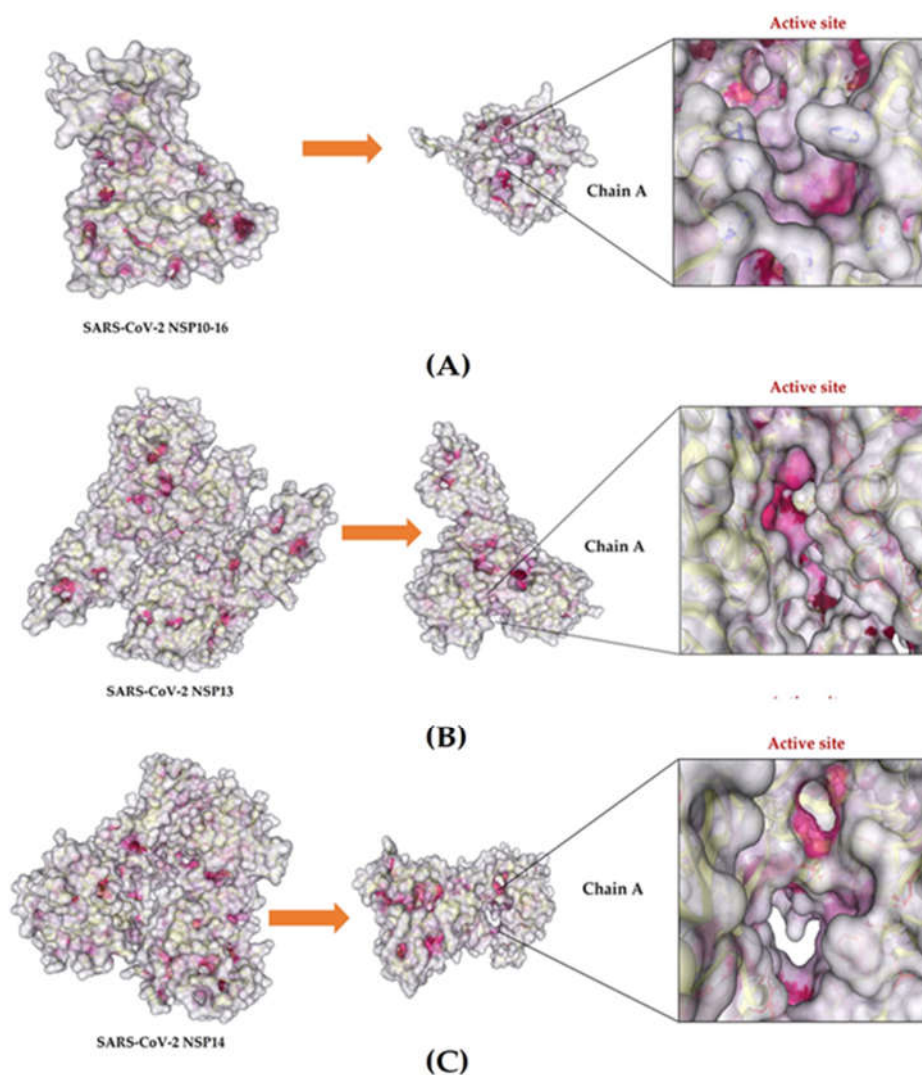

**Figure S1:** Protein crystal structures and their respective active sites (A) nsp16-nsp10 complex (B) nsp13 (C) nsp14.

| Natural products – Genus <i>Antilloorgia</i>                                                 |                                                     |
|----------------------------------------------------------------------------------------------|-----------------------------------------------------|
| <i>Americana</i>                                                                             | <i>Elisabethae</i>                                  |
| 1-monoacetate                                                                                | 3-epi-Elisabanolide                                 |
| 1 $\beta$ ,3 $\beta$ -dihydroxy-5 $\alpha$ ,6 $\alpha$ -epoxy-9-oxo-9,11-secogorgostan-11-ol | 3-O-Methylquercetin                                 |
| 3 $\beta$ -Hydroxy-5 $\alpha$ ,6 $\alpha$ -epoxy-9-oxo-9,11-secogorgostan-11-ol              | 4-Acetylaphilectolide                               |
| 5-Hydroperoxyicosa-2,4,6,8-tetraenoic acid                                                   | 7-Hydroxyerogorgiaene                               |
| 8-epi-Americanolide C                                                                        | 7-Hydroxyerogorgiaenone                             |
| 8-epi-Methoxyamericanolide A                                                                 | 7, 14-erogorgiaenediol                              |
| 10-epiamericanolide C                                                                        | 12-Acetoxypseudopterolide                           |
| 10-epi-Methoxyamericanolide A                                                                | 15 $\alpha$ -(Angeloyloxy) kaura-16-ene-18-oic acid |
| Ameristerol A                                                                                | (+)-Aristolone                                      |
| Ameristerenol A and B                                                                        | (+)- $\alpha$ -Terpineol                            |
| Americanolide A-F                                                                            | Aberrarone                                          |
| Beta-Gorgonene                                                                               | Amphilectolide                                      |
| (-)-beta-Chamigrene                                                                          | Amphiphenalene                                      |
| (-)-Curcuquinone                                                                             | Amphilectosin A and B                               |
| Calamenene                                                                                   | Biformene                                           |
| Caridiene                                                                                    | Bis-7-hydroxyerogorgiaene                           |
| Curcuhydroquinone                                                                            | Bicyclogermacrene                                   |
| Furanogermacrene                                                                             | Beta-Eudesmol                                       |
| Furanoguaian-4-ene                                                                           | Beta-Selinene                                       |
| Furanotriene                                                                                 | Caribenol A and B                                   |
| Gamma-Maaliene                                                                               | Colombiasin A                                       |
| Germacrene D                                                                                 | Cumbiasin A-C                                       |
| Iso-furanotriene                                                                             | Cyperene                                            |
| Methoxyamericanolide A                                                                       | Elisabanolide                                       |
| Methoxyamericanolide B                                                                       | Elisabatin A-C                                      |
| Methoxyamericanolide E                                                                       | Elisabethadienol                                    |
| Methoxyamericanolide G                                                                       | Elisabethadione                                     |
| Methoxyamericanolide H                                                                       | Elisabethamine                                      |
| Methoxyamericanolide I                                                                       | Elisabethatrienol                                   |
| Preclavulone A                                                                               | Elisabethin A-H                                     |
| Secogorgosterol                                                                              | Elisabethin A acetate                               |
|                                                                                              | Elisabethin D acetate                               |
|                                                                                              | Elisabetholide                                      |
|                                                                                              | Elisabethol                                         |
|                                                                                              | Elisapterosin A-F                                   |
|                                                                                              | Erogorgiaene                                        |
|                                                                                              | Ent-Kaur-16-en-19-ol                                |
|                                                                                              | Grandifloric acid                                   |
|                                                                                              | Homopseudopteroxazole                               |

|  |                                                                                             |
|--|---------------------------------------------------------------------------------------------|
|  | Hypersodie                                                                                  |
|  | Ileabethin                                                                                  |
|  | Ileabethoxazole                                                                             |
|  | Isopseudopterosin E                                                                         |
|  | Isoquercitrin                                                                               |
|  | Ichthyothereol acetate                                                                      |
|  | Kaempferol                                                                                  |
|  | Kaurenoic acid                                                                              |
|  | Kaurane-16,18-diol 18-acetate                                                               |
|  | O-methylelisabethadione                                                                     |
|  | O-methyl-nor-elisabethadione                                                                |
|  | Pseudopterolide                                                                             |
|  | Pseudopteroxazole                                                                           |
|  | Pseudopterosin A- Z                                                                         |
|  | Pseudopterosin E - MA                                                                       |
|  | Pseudopterosin G-J aglycone                                                                 |
|  | Quercetin                                                                                   |
|  | Quercetin 3-O-beta-D-arabinofuranoside                                                      |
|  | Sandresolide A-C                                                                            |
|  | Seco-pseudopterosin A-K                                                                     |
|  | Seco-pseudopteroxazole                                                                      |
|  | Taxifolin                                                                                   |
|  | CMNPD 11416, 12137, 12138, 12139, 12140, 12142,<br>16184, 16185, 16186, 16187, 17188, 5089. |

**Table S1:** List of NPs from *Antillogorgia Americana* and *Antillogorgia Elisabethae*.

| Ligands                                    | Binding affinity ('-4 to -5.9) | Interacting amino acids                                                                                                                                                               |
|--------------------------------------------|--------------------------------|---------------------------------------------------------------------------------------------------------------------------------------------------------------------------------------|
| 5-Hydroperoxyicosa-2,4,6,8-tetraenoic acid | -5.3                           | SER74 ASP75 ASP99 LEU100 ASN101 ASP130 MET131 TYR132 PRO134 LYS170 THR172 ASN198 SER201 GLU203                                                                                        |
| (+)-Aristolone                             | -5.7                           | CYS25 ASP26 LEU27 TYR30 LYS137 GLU173 HIS174 SER200 SER201 SER202 GLU203                                                                                                              |
| (+)-alpha-Terpineol                        | -5.2                           | CYS25 ASP26 LEU27 TYR30 LYS137 GLU173 HIS174 SER200 SER201 SER202                                                                                                                     |
| (-)-beta-Chamigrene                        | -5.5                           | CYS25 LEU27 TYR30 TYR132 LYS137 THR172 GLU173 HIS174 SER200 SER201 SER202 GLU203                                                                                                      |
| $\beta$ -gorgonene                         | -5.2                           | CYS25 LEU27 TYR30 TYR132 LYS137 THR172 GLU173 HIS174 SER200 SER201 SER202 GLU203                                                                                                      |
| Beta-Selinene                              | -5.7                           | LYS24 CYS25 ASP26 LEU27 TYR30 LYS137 VAL139 GLU173 HIS174 SER202                                                                                                                      |
| Calarene                                   | -5.2                           | LEU22 GLU23 LYS24 CYS25 ASN138 VAL139 LYS141 GLU142 ASN143 GLU173 HIS174                                                                                                              |
| Cumbiasin B                                | -4.7                           | LYS24 CYS25 ASP26 LEU27 TYR30 LYS137 VAL139 GLU173 HIS174 SER200 SER201 SER202                                                                                                        |
| Cumbiasin C                                | -4.2                           | LYS46 TYR132 PRO134 LYS137 LYS170 THR172 ASN198 SER201 SER202 GLU203                                                                                                                  |
| Cyperene                                   | -5.5                           | LYS24 CYS25 ASP26 LEU27 TYR30 LYS137 VAL139 GLU173 HIS174 SER200 SER201 SER202                                                                                                        |
| Elisabethadienol                           | -5.9                           | LYS24 CYS25 ASP26 LEU27 TYR30 LYS137 VAL139 GLU173 HIS174 SER200 SER201 SER202                                                                                                        |
| Elisabethatrienol                          | -5.7                           | LYS24 CYS25 ASP26 LEU27 TYR30 LYS137 VAL139 GLU173 HIS174 SER200 SER201 SER202                                                                                                        |
| Elisabethin B                              | -5                             | LEU27 TYR30 TYR132 LYS137 THR172 GLU173 ASN198 SER200 SER201 SER202 GLU203                                                                                                            |
| Elisabethin C                              | -5.7                           | TYR30 TYR132 LYS137 GLU173 ASN198 SER200 SER201 SER202 GLU203                                                                                                                         |
| Elisabethin D                              | -5.9                           | LEU27 TYR30 TYR132 LYS137 LYS170 THR172 ASN198 SER200 SER201 SER202 GLU203                                                                                                            |
| Elisabethin G                              | -5.5                           | TYR30 TYR132 LYS137 THR172 GLU173 ASN198 SER200 SER201 SER202 GLU203                                                                                                                  |
| Elisabetholide                             | -5.5                           | CYS25 LEU27 TYR30 TYR132 LYS137 THR172 GLU173 HIS174 ASN198 SER200 SER201 SER202 GLU203                                                                                               |
| Elisapterosin A                            | -5.7                           | TYR30 LYS46 TYR132 LYS137 LYS170 THR172 ASN198 SER200 SER201 SER202 GLU203                                                                                                            |
| furanotriene                               | -5.9                           | LYS24 CYS25 ASP26 LEU27 TYR30 LYS137 VAL139 GLU173 HIS174 SER201 SER202                                                                                                               |
| Gamma-Maaliene                             | -5.7                           | LYS24 CYS25 ASP26 LEU27 TYR30 TYR132 LYS137 VAL139 GLU173 HIS174 SER200 SER201 SER202<br>LYS24 CYS25 ASP26 LEU27 TYR30 TYR132 LYS137 VAL139 LYS170 THR172 GLU173 HIS174 SER201 SER202 |
| Ichthyothereol acetate                     | -5.9                           | GLU203                                                                                                                                                                                |
| Preclavulone A                             | -5.5                           | CYS25 LEU27 TYR30 LYS46 TYR132 LYS137 LYS170 THR172 GLU173 ASN198 SER200 SER201 SER202 GLU203                                                                                         |

Table S2: Low affinity NPs for target nsp16-nsp10.

| Ligands                                                                         | Binding affinity ('-6 to -6.9) | Interacting amino acids                                                                                                                                                                                                            |
|---------------------------------------------------------------------------------|--------------------------------|------------------------------------------------------------------------------------------------------------------------------------------------------------------------------------------------------------------------------------|
| 1-monoacetate                                                                   | -6.7                           | CYS25 ASP26 LEU27 TYR30 TYR132 LYS137 THR172 GLU173 ASN198 SER200 SER201 SER202 GLU203<br>TYR30 ASN43 LYS46 GLY73 SER74 ASP75 ASP130 TYR132 PRO134 LYS137 VAL139 LYS170 THR172<br>GLU173 HIS174 ASN198 SER200 SER201 SER202 GLU203 |
| 3 $\beta$ -Hydroxy-5 $\alpha$ ,6 $\alpha$ -epoxy-9-oxo-9,11-secogorgostan-11-ol | -6.7                           | GLU173 HIS174 ASN198 SER200 SER201 SER202 GLU203                                                                                                                                                                                   |
| 3-epi-Elisabanolide                                                             | -6.5                           | TYR30 LYS46 TYR132 LYS137 LYS170 THR172 ASN198 SER200 SER201 SER202 GLU203                                                                                                                                                         |
| 4-Acetylamphilectolide                                                          | -6.2                           | TYR30 LYS46 TYR132 LYS137 LYS170 THR172 ASN198 SER201 SER202 GLU203                                                                                                                                                                |
| 7-Hydroxyerogorgiaene                                                           | -6.5                           | LYS24 CYS25 ASP26 LEU27 TYR30 LYS137 VAL139 GLU173 HIS174 SER200 SER201 SER202                                                                                                                                                     |
| 7-Hydroxyerogorgiaenone                                                         | -6.7                           | LYS24 CYS25 ASP26 LEU27 TYR30 LYS137 VAL139 GLU173 SER200 SER201 SER202 GLU203                                                                                                                                                     |
| 7,14-erogorgiaenediol                                                           | -6.6                           | LYS24 CYS25 ASP26 LEU27 TYR30 LYS137 VAL139 GLU173 SER200 SER201 SER202 GLU203                                                                                                                                                     |
| 8-epi-Americanolide C                                                           | -6.5                           | LYS24 CYS25 ASP26 LEU27 TYR30 LYS137 VAL139 GLU173 SER200 SER201 SER202                                                                                                                                                            |
| 8-epi-Methoxyamericanolide A                                                    | -6.2                           | LYS24 CYS25 ASP26 LEU27 TYR30 LYS137 VAL139 GLU173 HIS174 SER200 SER201 SER202                                                                                                                                                     |
| 10-epi-Americanolide C                                                          | -6.5                           | LYS24 CYS25 LEU27 TYR30 LYS137 VAL139 THR172 GLU173 HIS174 SER200 SER201 SER202 GLU203<br>LYS24 CYS25 ASP26 LEU27 TYR30 LYS137 VAL139 THR172 GLU173 HIS174 SER200 SER201 SER202<br>GLU203                                          |
| 10-epi-Methoxyamericanolide A                                                   | -6.5                           | GLU203                                                                                                                                                                                                                             |
| 12-Acetoxypseudopterolide                                                       | -6.2                           | LYS24 CYS25 LEU27 TYR30 TYR132 LYS137 THR172 GLU173 SER200 SER201 SER202                                                                                                                                                           |
| Aberrarone                                                                      | -6.7                           | TYR30 LYS46 TYR132 LYS137 THR172 GLU173 ASN198 SER200 SER201 SER202 GLU203<br>LYS24 CYS25 ASP26 LEU27 TYR30 LYS46 TYR132 LYS137 VAL139 LYS170 THR172 GLU173 HIS174<br>ASN198 SER200 SER201 SER202 GLU203                           |
| Ameristerenol B                                                                 | -6.7                           | ASN198 SER200 SER201 SER202 GLU203                                                                                                                                                                                                 |
| Americanolide A                                                                 | -6.7                           | LYS24 CYS25 ASP26 LEU27 TYR30 TYR132 LYS137 VAL139 GLU173 HIS174 SER200 SER201 SER202                                                                                                                                              |
| Americanolide B                                                                 | -6.5                           | LYS24 CYS25 TYR30 LYS137 VAL139 GLU173 HIS174 SER200 SER201 SER202 GLU203                                                                                                                                                          |
| Americanolide C                                                                 | -6.5                           | LYS24 CYS25 ASP26 LEU27 TYR30 TYR132 LYS137 VAL139 GLU173 SER200 SER201 SER202                                                                                                                                                     |
| Amphilectolide                                                                  | -6.7                           | CYS25 ASP26 LEU27 TYR30 TYR132 LYS137 THR172 GLU173 SER200 SER201 SER202 GLU203                                                                                                                                                    |
| beta-Eudesmol                                                                   | -6.2                           | LYS24 CYS25 ASP26 LEU27 TYR30 LYS137 GLU173 SER200 SER201 SER202                                                                                                                                                                   |
| Bicyclogermacrene                                                               | -6.2                           | LYS24 CYS25 ASP26 LEU27 TYR30 LYS137 VAL139 GLU173 HIS174 SER200 SER201 SER202                                                                                                                                                     |
| Biformene                                                                       | -6.5                           | LYS24 CYS25 ASP26 LEU27 TYR30 TYR132 LYS137 GLU173 HIS174 SER200 SER201 SER202                                                                                                                                                     |
| Caribenol B                                                                     | -6.8                           | LYS24 CYS25 ASP26 LEU27 TYR30 LYS137 VAL139 GLU173 HIS174 SER202                                                                                                                                                                   |

|                      |      |                                                                                                                                                                                               |
|----------------------|------|-----------------------------------------------------------------------------------------------------------------------------------------------------------------------------------------------|
| Calamenene           | -6   | LYS24 CYS25 ASP26 LEU27 TYR30 LYS137 VAL139 GLU173 HIS174 SER200 SER202                                                                                                                       |
| Caridiene            | -6.5 | CYS25 ASP26 LEU27 TYR30 LYS137 VAL139 GLU173 HIS174 SER200 SER201 SER202                                                                                                                      |
| Curcuhydroquinone    | -6   | LYS24 CYS25 ASP26 LEU27 TYR30 LYS137 GLU173 SER200 SER201 SER202 GLU203                                                                                                                       |
| (-)-Curcuquinone     | -6.2 | LYS24 CYS25 ASP26 LEU27 TYR30 LYS137 GLU173 SER200 SER201 SER202 GLU203                                                                                                                       |
| Colombiasin A        | -6.7 | TYR30 TYR132 LYS137 THR172 GLU173 HIS174 SER200 SER201 SER202 GLU203                                                                                                                          |
| Cumbiasin A          | -6.9 | ASN43 LYS46 TYR132 PRO134 LYS137 LYS170 THR172 ASN198 SER201 GLU203                                                                                                                           |
| CMNPD5089            | -6.7 | LYS24 CYS25 ASP26 LEU27 GLN28 TYR30 LYS137 ASN138 VAL139 GLU173 SER200 SER202<br>LYS24 CYS25 ASP26 LEU27 TYR30 ASP32 LYS137 VAL139 THR172 GLU173 HIS174 ASN198 SER200<br>SER201 SER202 GLU203 |
| CMNPD11416           | -6.5 | LYS24 CYS25 ASP26 LEU27 TYR30 LYS137 VAL139 GLU173 HIS174 SER200 SER201 SER202                                                                                                                |
| CMNPD12137           | -6.2 | LYS24 CYS25 ASP26 LEU27 TYR30 TYR132 LYS137 LYS170 THR172 GLU173 SER200 SER201 SER202<br>GLU203                                                                                               |
| CMNPD12138           | -6.7 | LYS24 CYS25 ASP26 LEU27 TYR30 MET42 TYR132 PRO134 LYS137 VAL139 LYS170 THR172 GLU173<br>ASN198 SER200 SER201 SER202 GLU203                                                                    |
| CMNPD12139           | -6.9 | LYS24 CYS25 ASP26 LEU27 TYR30 LYS137 VAL139 GLU173 SER200 SER201 SER202                                                                                                                       |
| CMNPD16185           | -6.9 | TYR30 MET42 ASN43 LYS46 GLY71 GLY73 ASP130 TYR132 PRO134 LYS137 LYS170 THR172 ASN198<br>SER200 SER201 SER202 GLU203                                                                           |
| CMNPD16187           | -6.7 | LYS24 CYS25 ASP26 LEU27 TYR30 LYS46 TYR132 LYS137 VAL139 LYS170 THR172 GLU173 HIS174<br>SER200 SER201 SER202 GLU203                                                                           |
| CMNPD17188           | -6.9 | LYS24 CYS25 ASP26 LEU27 TYR30 LYS137 GLU173 HIS174 SER200 SER201 SER202                                                                                                                       |
| Ent-Kaur-16-en-19-ol | -6.7 | TYR30 LYS46 TYR132 LYS137 LYS170 THR172 ASN198 SER200 SER201 SER202 GLU203                                                                                                                    |
| Elisabanolide        | -6.7 | LYS24 CYS25 ASP26 LEU27 TYR30 TYR132 LYS137 VAL139 THR172 GLU173 HIS174 SER200 SER201<br>SER202 GLU203                                                                                        |
| Elisabethamine       | -6.2 | CYS25 LEU27 TYR30 TYR132 LYS137 THR172 GLU173 ASN198 SER200 SER201 SER202 GLU203                                                                                                              |
| Elisabethin A        | -6.7 | TYR30 TYR132 PRO134 LYS137 THR172 GLU173 SER200 SER201 SER202 GLU203                                                                                                                          |
| Elisabethin E        | -6.2 | CYS25 LEU27 TYR30 TYR132 PRO134 LYS137 THR172 GLU173 HIS174 SER200 SER201 SER202 GLU203                                                                                                       |
| Elisabethin F        | -6.2 |                                                                                                                                                                                               |

|                                       |      |                                                                                                                                                                                                 |
|---------------------------------------|------|-------------------------------------------------------------------------------------------------------------------------------------------------------------------------------------------------|
|                                       |      | LYS24 CYS25 ASP26 LEU27 TYR30 TYR132 LYS137 VAL139 GLU173 HIS174 SER200 SER201 SER202<br>GLU203                                                                                                 |
| Elisabethin H                         | -6.5 |                                                                                                                                                                                                 |
| Elisapterosin B                       | -6.2 | LYS24 CYS25 ASP26 LEU27 TYR30 LYS137 VAL139 GLU173 HIS174 SER200 SER201 SER202                                                                                                                  |
| Elisapterosin C                       | -6.7 | LEU27 TYR30 TYR132 PRO134 LYS137 THR172 GLU173 SER200 SER201 SER202 GLU203<br>CYS25 ASP26 LEU27 TYR30 TYR132 LYS137 VAL139 THR172 GLU173 HIS174 SER200 SER201 SER202<br>GLU203                  |
| Elisapterosin D                       | -6.2 |                                                                                                                                                                                                 |
| Elisapterosin E                       | -6   | MET42 ASN43 LYS46 TYR132 LYS137 LYS170 THR172 ASN198 SER201 GLU203                                                                                                                              |
| Erogorgiaene                          | -6.5 | LYS24 CYS25 ASP26 LEU27 TYR30 LYS137 VAL139 GLU173 HIS174 SER200 SER201 SER202                                                                                                                  |
| furanogermacrene                      | -6   | LYS24 CYS25 ASP26 LEU27 TYR30 LYS137 VAL139 GLU173 SER200 SER201 SER202                                                                                                                         |
| Furanoguaian-4-ene                    | -6.7 | LYS24 CYS25 ASP26 LEU27 TYR30 LYS137 VAL139 GLU173 SER200 SER201 SER202                                                                                                                         |
| Germacrene D                          | -6   | LYS24 CYS25 ASP26 LEU27 TYR30 LYS137 VAL139 GLU173 SER200 SER201 SER202                                                                                                                         |
| Isofuranotriene                       | -6   | LEU27 TYR30 TYR132 LYS137 THR172 SER200 SER201 SER202 GLU203<br>LYS24 CYS25 ASP26 LEU27 TYR30 TYR132 LYS137 THR172 GLU173 HIS174 SER200 SER201 SER202<br>GLU203                                 |
| Kaurane-16,18-diol18-acetate          | -6.5 |                                                                                                                                                                                                 |
| Kaurenoicacid                         | -6.5 | LYS24 CYS25 ASP26 LEU27 TYR30 TYR132 LYS137 GLU173 SER200 SER201 SER202                                                                                                                         |
| Methoxyamericanolide A                | -6.5 | LYS24 CYS25 ASP26 LEU27 TYR30 TYR132 LYS137 VAL139 GLU173 HIS174 SER200 SER201 SER202<br>LYS24 CYS25 ASP26 LEU27 TYR30 TYR132 LYS137 VAL139 THR172 GLU173 HIS174 SER200 SER201<br>SER202 GLU203 |
| Methoxyamericanolide E                | -6.5 |                                                                                                                                                                                                 |
| Methoxyamericanolide G                | -6.5 | LYS24 CYS25 ASP26 LEU27 TYR30 LYS137 VAL139 GLU173 HIS174 SER200 SER201 SER202                                                                                                                  |
| Methoxyamericanolide H                | -6.2 | LYS24 CYS25 ASP26 LEU27 TYR30 LYS137 VAL139 GLU173 HIS174 SER200 SER201 SER202 GLU203                                                                                                           |
| Methoxyamericanolide I                | -6   | LYS24 CYS25 ASP26 LEU27 TYR30 LYS137 VAL139 GLU173 HIS174 SER202                                                                                                                                |
| Pseudopterolide                       | -6   | ASN43 LYS46 TYR132 PRO134 LYS137 LYS170 THR172 ASN198 SER201 SER202 GLU203<br>LYS24 CYS25 ASP26 LEU27 TYR30 TYR132 PRO134 LYS135 LYS137 VAL139 THR172 GLU173 SER200<br>SER201 SER202 GLU203     |
| Pseudopterrosin S                     | -6.5 |                                                                                                                                                                                                 |
| Pseudopterrosin-MA                    | -6.5 | LYS24 CYS25 ASP26 LEU27 TYR30 LYS137 VAL139 GLU173 SER200 SER201 SER202<br>MET42 ASN43 LYS46 GLY71 GLY73 ASP130 MET131 TYR132 LYS137 LYS170 THR172 ASN198 SER201<br>SER202 GLU203               |
| Quercetin3-O-beta-D-arabinofuranoside | -6.5 |                                                                                                                                                                                                 |

|                       |      |                                                                                                                                |
|-----------------------|------|--------------------------------------------------------------------------------------------------------------------------------|
| Seco-pseudopterosin B | -6.5 | LYS24 CYS25 ASP26 LEU27 TYR30 LYS46 TYR132 PRO134 LYS137 VAL139 LYS170 THR172 GLU173 HIS174 ASN198 SER200 SER201 SER202 GLU203 |
| Seco-pseudopterosin J | -6.9 | LYS24 CYS25 LEU27 TYR30 TYR132 LYS137 VAL139 LYS170 THR172 GLU173 HIS174 SER200 SER201 SER202 GLU203                           |
| Secogorgosterol       | -6.5 | LYS24 CYS25 ASP26 LEU27 TYR30 TYR132 PRO134 LYS137 ILE171 THR172 GLU173 HIS174 SER200 SER201 SER202 GLU203                     |

**Table S3:** Lower-moderate affinity NPs for target nsp16-nsp10.

| Ligands                                                                                      | Binding affinity ('-7 to -7.9) | Interacting amino acids                                                                                                              |
|----------------------------------------------------------------------------------------------|--------------------------------|--------------------------------------------------------------------------------------------------------------------------------------|
| 1 $\beta$ ,3 $\beta$ -dihydroxy-5 $\alpha$ ,6 $\alpha$ -epoxy-9-oxo-9,11-secogorgostan-11-ol | -7.7                           | LYS24 CYS25 ASP26 LEU27 TYR30 MET42 ASN43 LYS46 ASP130 TYR132 LYS137 LYS170 THR172 GLU173 HIS174 ASN198 SER200 SER201 SER202 GLU203  |
| 3-O-Methylquercetin                                                                          | -7                             | LYS24 CYS25 ASP26 LEU27 TYR30 TYR132 PRO134 LYS137 LYS170 THR172 GLU173 HIS174 ASN198 SER200 SER201 SER202 GLU203 ASN233             |
| 15 $\alpha$ -(Angeloyloxy)kaura-16-ene-18-oicacid                                            | -7                             | ASN43 LYS46 ASP130 TYR132 LYS137 LYS170 THR172 ASN198 SER201 SER202 GLU203                                                           |
| Ameristerol A                                                                                | -7                             | CYS25 ASP26 LEU27 TYR30 MET42 ASN43 LYS46 ASP130 TYR132 PRO134 LYS137 LYS170 THR172 GLU173 HIS174 ASN198 SER200 SER201 SER202 GLU203 |
| Ameristerenol A                                                                              | -7.2                           | LYS24 CYS25 ASP26 LEU27 TYR30 LYS46 ASP130 TYR132 LYS137 LYS170 THR172 GLU173 ASN198 SER200 SER201 SER202 GLU203                     |
| Amphilectosin A                                                                              | -7                             | TYR30 MET42 ASN43 LYS46 GLY71 GLY73 SER74 ASP75 ASP99 ASP130 TYR132 PRO134 LYS137 LYS170 THR172 GLU173 ASN198 SER201 SER202 GLU203   |
| Amphilectosin B                                                                              | -7.2                           | CYS25 ASP26 LEU27 TYR30 MET42 ASN43 LYS46 ASP130 TYR132 LYS137 LYS170 THR172 GLU173 ASN198 SER200 SER201 SER202 GLU203               |
| Americanolide D                                                                              | -7.2                           | LYS24 CYS25 ASP26 LEU27 TYR30 TYR132 LYS137 VAL139 THR172 GLU173 HIS174 SER200 SER201 SER202 GLU203                                  |
| Americanolide E                                                                              | -7.2                           | LYS24 CYS25 ASP26 LEU27 TYR30 LYS137 VAL139 THR172 GLU173 HIS174 SER200 SER201 SER202                                                |



|                           |      |                                                                                                                                                                                                                            |
|---------------------------|------|----------------------------------------------------------------------------------------------------------------------------------------------------------------------------------------------------------------------------|
| Americanolide F           | -7   | LYS24 CYS25 ASP26 LEU27 TYR30 TYR132 LYS137 VAL139 GLU173 HIS174 SER200 SER201 SER202<br>GLU203                                                                                                                            |
| Amphiphenalone            | -7   | LYS24 CYS25 ASP26 LEU27 TYR30 LYS137 VAL139 GLU173 HIS174 SER200 SER201 SER202 GLU203<br>LYS24 CYS25 ASP26 LEU27 TYR30 LYS46 TYR132 PRO134 LYS137 VAL139 LYS170 THR172 GLU173<br>HIS174 ASN198 SER200 SER201 SER202 GLU203 |
| Bis-7-hydroxyerogorgiaene | -7.5 | LYS24 CYS25 ASP26 LEU27 TYR30 LYS137 VAL139 GLU173 HIS174 SER202                                                                                                                                                           |
| Caribenol A               | -7.5 | CYS25 LEU27 TYR30 TYR132 LYS137 THR172 GLU173 SER200 SER201 SER202 GLU203                                                                                                                                                  |
| CMNPD12140                | -7   | LYS24 CYS25 ASP26 LEU27 TYR30 LYS137 VAL139 GLU173 SER200 SER201 SER202                                                                                                                                                    |
| CMNPD12142                | -7.5 | CYS25 ASP26 LEU27 TYR30 TYR132 PRO134 LYS137 VAL139 GLU173 HIS174 SER200 SER201 SER202<br>GLU203                                                                                                                           |
| CMNPD16184                | -7.2 | LYS24 CYS25 ASP26 LEU27 TYR30 LYS137 VAL139 GLU173 SER201 SER202                                                                                                                                                           |
| CMNPD16186                | -7.7 | LYS24 CYS25 ASP26 LEU27 TYR30 LYS137 VAL139 GLU173 SER202                                                                                                                                                                  |
| Elisabethol               | -7.2 | LYS24 CYS25 ASP26 LEU27 TYR30 LYS137 VAL139 GLU173 SER200 SER201 SER202 GLU203                                                                                                                                             |
| Elisabatin A              | -7.7 | LYS24 CYS25 ASP26 LEU27 TYR30 LYS137 VAL139 GLU173 SER202                                                                                                                                                                  |
| Elisabatin B              | -7.9 | LYS24 CYS25 ASP26 LEU27 GLN28 TYR30 LYS137 VAL139 GLU173 SER200 SER202                                                                                                                                                     |
| Elisabatin C              | -7.2 | CYS25 LEU27 TYR30 TYR132 PRO134 LYS137 THR172 GLU173 ASN198 SER200 SER201 SER202<br>GLU203                                                                                                                                 |
| Elisabethin A acetate     | -7   | CYS25 LEU27 TYR30 TYR132 PRO134 LYS137 VAL139 THR172 GLU173 HIS174 SER200 SER201 SER202<br>GLU203                                                                                                                          |
| Elisabethin D acetate     | -7.2 | LYS24 CYS25 ASP26 LEU27 TYR30 LYS137 VAL139 THR172 GLU173 HIS174 SER200 SER201 SER202<br>GLU203                                                                                                                            |
| Elisapterosin F           | -7.7 | LYS24 CYS25 ASP26 LEU27 TYR30 LYS137 GLU173 HIS174 SER200 SER201 SER202                                                                                                                                                    |
| Grandifloric acid         | -7.2 | CYS25 ASP26 LEU27 TYR30 LYS46 TYR132 LYS137 LYS170 THR172 GLU173 ASN198 SER200 SER201<br>SER202 GLU203                                                                                                                     |
| Homopseudopteroxazole     | -7.5 | CYS25 ASP26 LEU27 TYR30 TYR132 LYS137 ASN138 VAL139 THR172 GLU173 SER201 SER202 GLU203<br>LYS24 CYS25 ASP26 LEU27 TYR30 TYR132 LYS137 ASN138 VAL139 THR172 GLU173 HIS174 SER201<br>SER202 GLU203                           |
| Hyperoside                | -7   |                                                                                                                                                                                                                            |
| Isoquercitrin             | -7.2 |                                                                                                                                                                                                                            |

|                              |      |                                                                                                                                                                                  |
|------------------------------|------|----------------------------------------------------------------------------------------------------------------------------------------------------------------------------------|
| Ileabethin                   | -7.1 | LYS24 CYS25 ASP26 LEU27 TYR30 LYS137 VAL139 GLU173 SER200 SER201 SER202<br>LYS24 CYS25 ASP26 LEU27 TYR30 LYS137 VAL139 THR172 GLU173 HIS174 SER200 SER201 SER202                 |
| Ileabethoxazole              | -7.2 | GLU203<br>LYS24 CYS25 ASP26 LEU27 TYR30 TYR132 LYS137 VAL139 LYS170 THR172 GLU173 HIS174 ASN198                                                                                  |
| Iso-pseudopterosin E         | -7.2 | SER200 SER201 SER202 GLU203                                                                                                                                                      |
| Kaempferol                   | -7   | TYR30 LYS46 ASP130 TYR132 LYS137 LYS170 THR172 GLU173 ASN198 SER201 SER202 GLU203                                                                                                |
| Methoxyamericanolide B       | -7.2 | LYS24 CYS25 ASP26 LEU27 TYR30 LYS137 VAL139 GLU173 HIS174 SER200 SER201 SER202 GLU203                                                                                            |
| O-methylelisabethadione      | -7   | CYS25 ASP26 LEU27 TYR30 TYR132 LYS137 THR172 GLU173 HIS174 SER200 SER201 SER202 GLU203<br>LYS24 CYS25 LEU27 TYR30 TYR132 LYS137 VAL139 LYS170 THR172 GLU173 HIS174 SER200 SER201 |
| O-methyl-nor-elisabethadione | -7.2 | SER202 GLU203<br>LYS24 CYS25 ASP26 LEU27 TYR30 MET42 LYS46 TYR132 LYS137 VAL139 LYS170 THR172 GLU173                                                                             |
| Pseudopterosin B             | -7.9 | ASN198 SER200 SER201 SER202 GLU203<br>LYS24 CYS25 ASP26 LEU27 TYR30 MET42 LYS46 TYR132 LYS137 VAL139 THR172 GLU173 ASN198                                                        |
| Pseudopterosin C             | -7.8 | SER200 SER201 SER202 GLU203<br>LYS24 CYS25 ASP26 LEU27 TYR30 ASP32 SER33 TYR132 LYS137 VAL139 GLU173 ASN198 SER200                                                               |
| Pseudopterosin D             | -7.9 | SER201 SER202 GLU203<br>LYS24 CYS25 ASP26 LEU27 TYR30 TYR132 PRO134 LYS137 VAL139 THR172 GLU173 HIS174 SER200                                                                    |
| Pseudopterosin E             | -7.8 | SER201 SER202 GLU203<br>LYS24 CYS25 ASP26 LEU27 TYR30 TYR132 PRO134 LYS137 VAL139 THR172 GLU173 HIS174 ASN198                                                                    |
| Pseudopterosin F             | -7.5 | SER200 SER201 SER202 GLU203<br>LYS24 CYS25 ASP26 LEU27 TYR30 LYS46 TYR132 LYS137 VAL139 LYS170 THR172 GLU173 ASN198                                                              |
| Pseudopterosin G             | -7.7 | SER201 SER202 GLU203<br>LYS24 CYS25 ASP26 LEU27 TYR30 ASN43 LYS46 TYR132 LYS137 VAL139 LYS170 ILE171 THR172                                                                      |
| Pseudopterosin J             | -7.5 | GLU173 ASN198 SER201 SER202 GLU203<br>LYS24 CYS25 ASP26 LEU27 TYR30 TYR132 PRO134 LYS137 VAL139 THR172 GLU173 HIS174 SER200                                                      |
| Pseudopterosin K             | -7.5 | SER201 SER202                                                                                                                                                                    |

|                             |      |                                                                                                                                                                                |
|-----------------------------|------|--------------------------------------------------------------------------------------------------------------------------------------------------------------------------------|
| Pseudopterosin L            | -7.7 | LYS24 CYS25 ASP26 LEU27 TYR30 LYS46 TYR132 LYS137 VAL139 LYS170 THR172 GLU173 HIS174<br>ASN198 SER201 SER202 GLU203                                                            |
| Pseudopterosin M            | -7.9 | LYS24 CYS25 ASP26 LEU27 TYR30 LYS46 TYR132 LYS137 VAL139 LYS170 THR172 GLU173 HIS174<br>ASN198 SER200 SER201 SER202 GLU203                                                     |
| Pseudopterosin N            | -7.5 | LYS24 CYS25 LEU27 TYR30 TYR132 LYS137 VAL139 LYS170 THR172 GLU173 ASN198 SER200 SER201<br>SER202 GLU203                                                                        |
| Pseudopterosin O            | -7.5 | LYS24 CYS25 LEU27 TYR30 ASP32 MET42 LYS46 TYR132 LYS137 VAL139 THR172 GLU173 ASN198<br>SER200 SER201 SER202 GLU203                                                             |
| Pseudopterosin P            | -7.5 | CYS25 LEU27 TYR30 ASN43 LYS46 TYR132 PRO134 LYS137 VAL139 LYS170 ILE171 THR172 GLU173<br>ASN198 SER200 SER201 SER202 GLU203                                                    |
| Pseudopterosin Q            | -7.7 | LYS24 CYS25 LEU27 TYR30 LYS46 TYR132 LYS137 ASN138 VAL139 LYS170 THR172 GLU173 HIS174<br>ASN198 SER200 SER201 SER202 GLU203                                                    |
| Pseudopterosin U            | -7.5 | CYS25 LEU27 TYR30 MET42 ASN43 LYS46 TYR132 LYS137 THR172 GLU173 ASN198 SER200 SER201<br>SER202 GLU203                                                                          |
| Pseudopterosin W            | -7.7 | LYS24 CYS25 LEU27 TYR30 LYS46 TYR132 PRO134 LYS137 VAL139 LYS170 THR172 GLU173 ASN198<br>SER200 SER201 SER202 GLU203                                                           |
| Pseudopterosin Z            | -7.2 | LYS24 CYS25 ASP26 LEU27 TYR30 MET42 ASN43 LYS46 TYR132 LYS137 VAL139 LYS170 THR172<br>GLU173 HIS174 ASN198 SER200 SER201 SER202 GLU203                                         |
| Pseudopterosin G-J aglycone | -7   | LYS24 CYS25 ASP26 LEU27 TYR30 LYS137 VAL139 GLU173 HIS174 SER200 SER201 SER202                                                                                                 |
| Pseudopteroxazole           | -7   | LYS24 CYS25 ASP26 LEU27 TYR30 LYS137 VAL139 GLU173 HIS174 SER201 SER202                                                                                                        |
| Quercetin                   | -7.5 | LYS24 CYS25 ASP26 LEU27 TYR30 TYR132 LYS137 THR172 GLU173 SER200 SER201 SER202 GLU203<br>LYS24 CYS25 ASP26 LEU27 TYR30 TYR132 PRO134 LYS137 THR172 GLU173 HIS174 SER200 SER201 |
| Taxifolin                   | -7.5 | SER202 GLU203<br>LEU27 TYR30 MET42 ASN43 LYS46 GLY73 SER74 ASP130 TYR132 LYS137 LYS170 THR172 GLU173                                                                           |
| Seco-pseudopterosin A       | -7.2 | ASN198 SER200 SER201 SER202 GLU203<br>LEU27 TYR30 MET42 ASN43 LYS46 ASP130 TYR132 LYS137 LYS170 THR172 GLU173 ASN198 SER200                                                    |
| Seco-pseudopterosin C       | -7   | SER201 SER202 GLU203                                                                                                                                                           |

|                        |      |                                                                                                                                     |
|------------------------|------|-------------------------------------------------------------------------------------------------------------------------------------|
| Seco-pseudopterosin D  | -7.2 | LYS24 CYS25 ASP26 LEU27 TYR30 TYR132 LYS137 VAL139 THR172 GLU173 HIS174 SER200 SER201 SER202 GLU203                                 |
| Seco-pseudopterosin E  | -7   | LEU27 TYR30 MET42 ASN43 LYS46 GLY71 GLY73 ASP99 ASP130 MET131 TYR132 PRO134 LYS137 LYS170 THR172 ASN198 SER200 SER201 SER202 GLU203 |
| Seco-pseudopterosin F  | -7.2 | CYS25 ASP26 LEU27 TYR30 MET42 ASN43 LYS46 TYR132 PRO134 LYS137 LYS170 THR172 GLU173 HIS174 SER200 SER201 SER202 GLU203              |
| Seco-pseudopterosin G  | -7.2 | LYS24 CYS25 ASP26 LEU27 TYR30 LYS46 TYR132 LYS137 LYS170 THR172 GLU173 HIS174 ASN198 SER200 SER201 SER202 GLU203                    |
| Seco-pseudopterosin H  | -7   | LYS24 CYS25 LEU27 TYR30 ASP32 MET42 LYS46 TYR132 LYS137 ASN138 VAL139 THR172 GLU173 HIS174 ASN198 SER200 SER201 SER202 GLU203       |
| Seco-pseudopterosin I  | -7   | LYS24 CYS25 LEU27 TYR30 LYS46 TYR132 LYS137 VAL139 THR172 GLU173 HIS174 ASN198 SER200 SER201 SER202 GLU203                          |
| Seco-pseudopterosin K  | -7.5 | LYS24 CYS25 ASP26 LEU27 TYR30 LYS46 TYR132 LYS137 VAL139 THR172 GLU173 ASN198 SER200 SER201 SER202 GLU203                           |
| Sandresolide A         | -7.5 | CYS25 ASP26 LEU27 TYR30 TYR132 LYS137 THR172 GLU173 SER200 SER201 SER202 GLU203                                                     |
| Sandresolide C         | -7   | LYS24 CYS25 ASP26 LEU27 TYR30 LYS137 VAL139 THR172 GLU173 SER200 SER201 SER202 GLU203                                               |
| Seco-pseudopteroxazole | -7   | LYS24 CYS25 ASP26 LEU27 TYR30 TYR132 LYS137 VAL139 THR172 GLU173 SER200 SER201 SER202 GLU203                                        |

Table S4: Upper-moderate affinity NPs for nsp16-nsp10 protein complex

| Ligands          | Binding affinity ('-8.0 and above) | Interacting amino acids                                                                                                 |
|------------------|------------------------------------|-------------------------------------------------------------------------------------------------------------------------|
| Pseudopterosin A | -8                                 | LYS24 CYS25 ASP26 TYR30 LYS46 ASP130 TYR132 LYS137 VAL139 LYS170 THR172 GLU173 HIS174 ASN198 SER201 SER202 GLU203       |
| Pseudopterosin H | -8.2                               | LYS24 CYS25 ASP26 LEU27 TYR30 TYR132 PRO134 LYS137 VAL139 LYS170 THR172 GLU173 ASN198 SER200 SER201 SER202 GLU203       |
| Pseudopterosin I | -8.2                               | LYS24 CYS25 ASP26 LEU27 TYR30 LYS46 TYR132 PRO134 LYS137 VAL139 THR172 GLU173 ASN198 SER200 SER201 SER202 GLU203        |
| Pseudopterosin R | -8.2                               | LYS24 CYS25 ASP26 LEU27 TYR30 LYS46 TYR132 LYS137 VAL139 LYS170 THR172 GLU173 HIS174 ASN198 SER200 SER201 SER202 GLU203 |

|                  |      |                                                                                                                    |
|------------------|------|--------------------------------------------------------------------------------------------------------------------|
| Pseudopterosin T | -8   | CYS25 ASP26 LEU27 TYR30 TYR132 PRO134 LYS137 LYS170 ILE171 THR172 GLU173 HIS174 ASN198 SER200 SER201 SER202 GLU203 |
| Pseudopterosin V | -8.2 | LYS24 CYS25 ASP26 LEU27 TYR30 TYR132 PRO134 LYS137 LYS170 THR172 GLU173 HIS174 ASN198 SER200 SER201 SER202 GLU203  |
| Pseudopterosin X | -8   | LEU27 TYR30 MET42 ASN43 LYS46 ASP130 TYR132 LYS137 LYS170 THR172 GLU173 ASN198 SER200 SER201 SER202 GLU203         |
| Pseudopterosin Y | -8   | CYS25 ASP26 LEU27 TYR30 LYS46 TYR132 PRO134 LYS137 THR172 GLU173 HIS174 ASN198 SER200 SER201 SER202 GLU203         |
| Sandresolide B   | -8   | CYS25 ASP26 LEU27 TYR30 TYR132 LYS137 THR172 GLU173 HIS174 SER200 SER201 SER202 GLU203                             |

Table S5: High affinity NPs for nsp16-nsp10 enzyme complex.

| Ligands                                    | Binding affinity ('-5 to -5.9) | Interacting amino acids                                                                                                                                                                                                                                                      |
|--------------------------------------------|--------------------------------|------------------------------------------------------------------------------------------------------------------------------------------------------------------------------------------------------------------------------------------------------------------------------|
| 5-Hydroperoxyicosa-2,4,6,8-tetraenoic acid | -5.5                           | PRO284 LYS288 SER289 ALA316 GLU319 LYS320 ASP374 GLU375 ILE376 SER377 MET378 ILE399 GLY400 ASP401 GLN404 LEU405 ARG443 GLN537 GLY538 SER539 GLU540 ARG567<br>PRO284 GLY285 GLY287 LYS288 SER289 ALA313 ALA316 LYS320 ASP374 GLU375 GLN404 ARG443 GLN537 GLY538 GLU540 ARG567 |
| 7,14-erogorgiaenediol                      | -5.7                           | GLU540 ARG567                                                                                                                                                                                                                                                                |
| 12-Acetoxypseudopterolide                  | -5                             | ASN179 CYS309 SER310 HIS311 ALA312 ARG339 VAL340 GLU375 MET378 THR532 ASP534 SER535 GLN537                                                                                                                                                                                   |
| (+)-alpha-Terpineol                        | -5.2                           | LYS288 ALA312 ALA313 ALA316 ASP374 GLU375 ILE376 SER377 ILE399 GLY400 ASP401 GLN404 GLN537 GLY538                                                                                                                                                                            |
| Beta-Eudesmol                              | -5.9                           | LYS288 SER289 ALA312 ALA313 VAL314 ALA316 LEU317 ASP374 GLU375 ARG443 GLY538                                                                                                                                                                                                 |
| Beta-Selinene                              | -5.7                           | GLY287 LYS288 SER289 ALA313 ALA316 ASP374 GLU375 GLN404 ARG443 GLN537 GLY538                                                                                                                                                                                                 |
| Bicyclogermacrene                          | -5.5                           | GLY285 GLY287 LYS288 SER289 ALA313 ALA316 LEU317 ASP374 GLU375 GLN404 ARG443 GLN537 GLY538                                                                                                                                                                                   |
| $\beta$ -gorgonene                         | -5                             | GLY285 THR286 GLY287 LYS288 SER289 ALA316 LEU317 ASP374 GLU375 GLN404 ARG443 GLY538 SER539 ARG567                                                                                                                                                                            |
| Cyperene                                   | -5.7                           | LYS288 SER289 ALA312 ALA313 ALA316 LEU317 ASP374 GLU375 GLN404 ARG443 GLN537 GLY538                                                                                                                                                                                          |
| Calamenene                                 | -5.7                           | PRO284 GLY285 LYS288 SER289 ALA313 ALA316 ASP374 GLU375 GLN404 ARG443 GLN537 GLY538 ARG567                                                                                                                                                                                   |
| Calarene                                   | -5                             | GLY285 GLY287 LYS288 SER289 HIS290 ALA316 LYS320 ARG443 GLY538 GLU540<br>PRO284 GLY285 THR286 GLY287 LYS288 SER289 ALA312 ALA313 ALA316 ASP374 GLU375 GLN404 ARG443 GLN537                                                                                                   |
| Caridiene                                  | -5.7                           | GLY538<br>HIS311 ALA312 ALA313 ASP315 ALA316 GLU319 VAL340 GLU341 GLN531 SER535 SER536 GLN537 GLY538 SER539                                                                                                                                                                  |
| CMNPD12139                                 | -5.5                           | GLU540 TYR541                                                                                                                                                                                                                                                                |
| CMNPD16184                                 | -5.2                           | SER310 HIS311 ALA312 ASP315 VAL340 GLU341 GLU375 MET378 GLN531 ASP534 SER535 SER536 GLN537                                                                                                                                                                                   |

|                              |      |                                                                                                                                                                                                        |
|------------------------------|------|--------------------------------------------------------------------------------------------------------------------------------------------------------------------------------------------------------|
| CMNPD16185                   | -5.2 | ALA312 ALA313 ASP315 ALA316 GLU319 PHE343 SER535 GLN537 GLY538 SER539                                                                                                                                  |
| Elisabethol                  | -5.5 | HIS311 ALA312 ALA313 ASP315 ALA316 GLU319 GLU341 PHE343 SER535 GLN537 GLY538 SER539 GLU540                                                                                                             |
| Elisabethin A acetate        | -5.2 | ALA312 ALA313 ASP315 ALA316 GLU319 GLN531 SER535 GLN537 GLY538 SER539 GLU540 TYR541                                                                                                                    |
| Elisabethin B                | -5.5 | GLY285 THR286 GLY287 LYS288 SER289 HIS290 ALA316 GLU319 LYS320 ARG443 GLY538 SER539 GLU540                                                                                                             |
| Elisabethin C                | -5.5 | PRO283 PRO284 GLY285 THR286 GLY287 LYS288 SER289 HIS290 ALA316 LYS320 ASP374 ARG443 GLY538 GLU540                                                                                                      |
| Elisabethin D acetate        | -5.7 | ASN179 CYS309 SER310 HIS311 ALA312 ALA313 GLU375 MET378 ASP534 SER535 GLN537 GLY538                                                                                                                    |
| Elisabethin E                | -5.5 | SER289 ALA316 GLU319 LYS320 ARG443 GLY538 SER539 GLU540                                                                                                                                                |
| Elisabethin G                | -5.7 | PRO283 PRO284 GLY285 THR286 GLY287 LYS288 SER289 HIS290 ALA316 LYS320 ASP374 ARG443 GLY538 GLU540                                                                                                      |
| Elisabetholide               | -5.2 | ASN179 CYS309 SER310 HIS311 ALA312 ALA313 ARG339 GLU375 MET378 GLN531 ASP534 SER535 GLN537                                                                                                             |
| furanogermacrene             | -5.2 | GLY285 THR286 GLY287 LYS288 SER289 HIS290 ALA316 LYS320 ARG443 GLY538 GLU540                                                                                                                           |
| furanotriene                 | -5.9 | PRO284 GLY285 LYS288 SER289 ALA313 ALA316 LEU317 ASP374 GLU375 ARG443 GLN537 GLY538                                                                                                                    |
| Gamma-Maaliene               | -5.5 | GLY285 THR286 GLY287 LYS288 SER289 ALA316 LYS320 ASP374 ARG443 GLY538 GLU540                                                                                                                           |
| Germacrene D                 | -5.2 | GLY287 LYS288 SER289 HIS290 ALA316 LEU317 GLU319 LYS320 ASP374 ARG443 GLY538                                                                                                                           |
| Grandifloric acid            | -5.5 | SER310 HIS311 ALA312 VAL340 GLU375 MET378 ASP534 SER535 SER536 GLN537 GLY538                                                                                                                           |
| Ichthyothereol acetate       | -5.7 | PRO283 PRO284 GLY285 THR286 GLY287 LYS288 SER289 ALA316 GLU319 ASP374 ARG443 GLY538                                                                                                                    |
| Isofuranotriene              | -5.5 | PRO284 GLY285 GLY287 LYS288 SER289 HIS290 ALA313 ALA316 LEU317 ASP374 GLN404 ARG443 GLY538 ARG567                                                                                                      |
| Kaurane-16,18-diol18-acetate | -5.2 | VAL181 SER310 HIS311 ALA312 ARG339 VAL340 GLU375 MET378 ASP534 SER535 GLN537                                                                                                                           |
| Pseudopterolide              | -5.5 | HIS311 ALA312 ASP315 ALA316 GLU319 VAL340 GLU341 CYS342 PHE343 GLN531 SER535 GLN537 GLY538 SER539<br>CYS309 SER310 ALA312 ASP315 ALA316 GLU319 VAL340 GLU341 GLU375 MET378 GLN531 ASP534 SER535 SER536 |
| Pseudopterosin D             | -5.7 | GLN537 GLY538 SER539                                                                                                                                                                                   |
| Pseudopterosin G             | -5.9 | GLY285 LYS288 SER289 ALA312 ALA313 ALA316 LEU317 GLU319 ASP374 ARG443 GLY538 SER539 GLU54                                                                                                              |
| Pseudopterosin-MA            | -5.0 | LYS288 ALA312 ASP315 ALA316 GLU319 GLU341 CYS342 PHE343 GLN404 GLN531 SER535 GLY538 SER539                                                                                                             |
| Sandresolide A               | -5.5 | HIS311 ALA312 ALA313 ASP315 ALA316 GLU319 CYS342 PHE343 ASP344 GLN531 SER535 GLN537 GLY538 SER539                                                                                                      |

Table S6: Low affinity NPs for target nsp13.

| Ligands                                                    | Binding affinity ('-6 to -6.9) | Interacting amino acids                                                                                                       |
|------------------------------------------------------------|--------------------------------|-------------------------------------------------------------------------------------------------------------------------------|
| 1-monoacetate                                              | -6.2                           | PRO283 PRO284 GLY285 THR286 GLY287 LYS288 SER289 ALA313 ALA316 ASP374 GLU375 GLY400 ASP401 GLN404 ARG443 GLN537 GLY538        |
| 1β,3β-dihydroxy-5α,6α-epoxy-9-oxo-9,11-secogorgostan-11-ol | -6                             | PRO284 GLY285 GLY287 LYS288 SER289 ALA313 ALA316 LEU317 GLU319 LYS320 ASP374 GLU375 GLN404 ARG443 GLY538 SER539 GLU540 ARG567 |
| 3β-Hydroxy-5α,6α-epoxy-9-oxo-9,11-secogorgostan-11-ol      | -6.7                           | PRO283 PRO284 GLY285 THR286 GLY287 LYS288 SER289 ALA312 ASP315 ALA316 GLU319 LYS320 ARG443 GLY538 SER539 GLU540               |
| 3-O-Methyl Quercetin                                       | -6.2                           | GLY285 THR286 GLY287 LYS288 SER289 ALA313 ALA316 GLU319 ASP374 GLU375 ILE399 GLY400 GLN404 ARG443 GLN537 GLY538 GLU540        |
| 7-Hydroxyerogorgiaene                                      | -6.5                           | PRO284 GLY285 GLY287 LYS288 SER289 ALA313 ALA316 GLU319 LYS320 ASP374 GLU375 GLN404 ARG443 GLN537 GLY538 ARG567               |
| 7-Hydroxyerogorgiaenone                                    | -6.2                           | PRO284 GLY285 GLY287 LYS288 SER289 ALA313 ALA316 LYS320 ASP374 GLU375 GLN404 ARG443 GLN537 GLY538 GLU540 ARG567               |
| 8-epi-Americanolide C                                      | -6.5                           | GLY282 PRO283 PRO284 GLY285 THR286 GLY287 LYS288 SER289 HIS290 ALA316 LYS320 ARG443 GLY538                                    |
| 8-epi-Methoxyamericanolide A                               | -6.2                           | PRO283 PRO284 GLY285 THR286 GLY287 LYS288 SER289 HIS290 ALA316 LYS320 ARG443 GLY538 SER539 GLU540                             |
| 10-epi-Methoxyamericanolide A                              | -6.7                           | PRO283 PRO284 GLY285 THR286 GLY287 LYS288 SER289 HIS290 ALA316 GLU319 LYS320 ARG443 GLY538 GLU540                             |
| 15α-(Angeloyloxy)kaura-16-ene-18-oicacid                   | -6.7                           | GLY285 THR286 GLY287 LYS288 SER289 ALA312 ASP315 ALA316 GLU319 ASP374 ARG443 GLY538 SER539 GLU540 ARG567                      |
| (+)-Aristolone                                             | -6.5                           | PRO283 PRO284 GLY285 THR286 GLY287 LYS288 SER289 HIS290 ALA316 LYS320 ASP374 ARG443 GLY538 GLU540                             |
| Amersiterol A                                              | -6.5                           | PRO283 PRO284 GLY285 THR286 GLY287 LYS288 SER289 ALA312 ASP315 ALA316 LEU317 GLU319 LYS320 ARG443 GLY538 SER539 GLU540        |

|                           |      |                                                                                                                                                                                                                                                                                                                                                                                                                                                       |
|---------------------------|------|-------------------------------------------------------------------------------------------------------------------------------------------------------------------------------------------------------------------------------------------------------------------------------------------------------------------------------------------------------------------------------------------------------------------------------------------------------|
| Ameristerenol A           | -6.9 | GLY285 THR286 GLY287 LYS288 SER289 HIS290 ALA312 ALA313 ASP315 ALA316 GLU319 LYS320<br>ARG443 GLN537 GLY538 SER539 GLU540<br>PRO284 GLY285 LYS288 SER289 ALA313 ALA316 LEU317 ASP374 GLU375 GLN404 ARG443 GLN537<br>GLY538 SER539 ARG567<br>PRO283 PRO284 GLY285 THR286 GLY287 LYS288 SER289 ALA313 ALA316 ASP374 GLU375 GLN404<br>ARG443 GLN537 GLY538                                                                                               |
| Americanolide C           | -6.7 | GLY285 GLY287 LYS288 SER289 HIS290 ALA316 GLU319 LYS320 ASP374 ARG443 GLY538 SER539<br>PRO284 GLY285 LYS288 SER289 ALA316 LEU317 ASP374 GLU375 GLN404 ARG443 GLN537 GLY538<br>ARG567<br>GLY285 LYS288 SER289 SER310 ALA312 ALA313 ALA316 ASP374 GLU375 GLN404 ARG443 GLN537<br>GLY538 ARG567                                                                                                                                                          |
| Americanolide D           | -6.2 | SER289 HIS311 ALA312 ALA313 ASP315 ALA316 LEU317 GLU319 LYS320 GLU341 ASP374 ARG443<br>GLN537 GLY538 SER539 TYR541                                                                                                                                                                                                                                                                                                                                    |
| Americanolide E           | -6   | LYS288 SER289 ALA313 ALA316 LEU317 ASP374 GLU375 GLN404 ARG443 GLN537 GLY538 ARG567<br>PRO283 PRO284 GLY285 THR286 GLY287 LYS288 SER289 ALA316 ASP374 GLU375 SER377 GLY400<br>ASP401 GLN404 ARG443 GLN537 GLY538<br>PRO283 PRO284 GLY285 THR286 LYS288 SER289 ALA313 ALA316 LEU317 ASP374 GLU375 SER377<br>GLY400 ASP401 GLN404 ARG443 GLN537 GLY538                                                                                                  |
| Americanolide F           | -6.5 | GLY285 LYS288 SER289 ALA316 LEU317 LYS320 ARG443 GLY538 SER539 GLU540<br>PRO284 GLY285 GLY287 LYS288 SER289 HIS290 ALA316 LEU317 LYS320 ASP374 ARG443 GLY538 SER539<br>GLU540<br>PRO283 PRO284 GLY285 THR286 GLY287 LYS288 SER289 ALA312 ALA313 VAL314 ALA316 LEU317<br>LYS320 ASP374 GLU375 GLN404 ARG443 GLN537 GLY538 ARG567<br>GLY285 THR286 GLY287 LYS288 SER289 ALA312 ALA313 ALA316 LYS320 ASP374 GLU375 ILE399<br>ARG443 GLN537 GLY538 SER539 |
| Biformene                 | -6   |                                                                                                                                                                                                                                                                                                                                                                                                                                                       |
| Bis-7-hydroxyerogorgiaene | -6.2 |                                                                                                                                                                                                                                                                                                                                                                                                                                                       |
| (-)-beta-Chamigrene       | -6   |                                                                                                                                                                                                                                                                                                                                                                                                                                                       |
| (-)-Curcuquinone          | -6.5 |                                                                                                                                                                                                                                                                                                                                                                                                                                                       |
| Curcuhydroquinone         | -6   |                                                                                                                                                                                                                                                                                                                                                                                                                                                       |
| Cumbiasin C               | -6.7 |                                                                                                                                                                                                                                                                                                                                                                                                                                                       |
| Caribenol A               | -6.7 |                                                                                                                                                                                                                                                                                                                                                                                                                                                       |
| Caribenol B               | -6.9 |                                                                                                                                                                                                                                                                                                                                                                                                                                                       |
| CMNPD5089                 | -6   |                                                                                                                                                                                                                                                                                                                                                                                                                                                       |
| CMNPD11416                | -6.2 |                                                                                                                                                                                                                                                                                                                                                                                                                                                       |



|                   |      |                                                                                                                                                                         |
|-------------------|------|-------------------------------------------------------------------------------------------------------------------------------------------------------------------------|
| CMNPD12137        | -6.5 | GLY285 THR286 GLY287 LYS288 SER289 ALA316 ASP374 GLU375 ILE376 SER377 GLY400 ASP401 GLN404 ARG443 GLN537 GLY538                                                         |
| CMNPD12138        | -6.5 | PRO283 PRO284 GLY285 THR286 GLY287 LYS288 SER289 SER310 ALA312 ALA313 ALA316 LEU317 ASP374 GLU375 GLN404 ARG443 GLN537 GLY538 SER539 ARG567                             |
| CMNPD12140        | -6.9 | GLY285 THR286 GLY287 LYS288 SER289 HIS290 ALA316 LYS320 ARG443 GLY538 SER539 GLU540 PRO283 PRO284 GLY285 THR286 GLY287 LYS288 SER289 ALA313 ALA316 LEU317 ASP374 GLU375 |
| CMNPD17188        | -6.5 | GLY400 GLN404 ARG443 GLN537 GLY538 SER539 GLU540 ARG567                                                                                                                 |
| Elisabanolide     | -6.7 | GLY285 SER289 ASP315 ALA316 GLU319 LYS320 ARG443 GLY538 SER539 GLU540 PRO284 GLY285 LYS288 SER289 ALA313 ALA316 LEU317 ASP374 GLU375 GLN404 ARG443 GLN537               |
| Elisabatin B      | -6.7 | GLY538 ARG567                                                                                                                                                           |
| Elisabatin C      | -6.7 | GLY282 PRO283 PRO284 GLY285 THR286 LYS288 SER289 ALA313 ALA316 LEU317 ASP374 GLU375 GLN404 ARG443 GLN537 GLY538 ARG567                                                  |
| Elisabethadienol  | -6.5 | GLY285 THR286 GLY287 LYS288 SER289 HIS290 ALA313 ALA316 LEU317 LYS320 ASP374 GLU375 GLY400 ASP401 GLN404 ARG443 GLN537 GLY538 SER539 GLU540                             |
| Elisabethamine    | -6.2 | GLY282 PRO283 PRO284 GLY285 THR286 GLY287 LYS288 SER289 ALA313 ASP315 ALA316 GLU319 ASP374 GLU375 GLN404 ARG443 GLN537 GLY538 ARG567                                    |
| Elisabethatrienol | -6   | PRO284 GLY285 LYS288 SER289 SER310 ALA312 ALA313 ALA316 LEU317 ASP374 GLU375 GLN404 ARG443 GLN537 GLY538 SER539 ARG567                                                  |
| Elisabethin A     | -6.2 | GLY285 THR286 GLY287 LYS288 SER289 HIS290 ALA316 LEU317 GLU319 LYS320 ARG443 GLY538 SER539 GLU540                                                                       |
| Elisabethin D     | -6.5 | GLY285 LYS288 SER289 ALA316 GLU319 LYS320 ARG443 GLY538 SER539 GLU540 PRO283 PRO284 GLY285 THR286 GLY287 LYS288 SER289 ALA313 ALA316 LEU317 ASP374 GLU375               |
| Elisabethin F     | -6.2 | GLN404 ARG443 GLN537 GLY538 SER539 GLU540 ARG567                                                                                                                        |
| Elisabethin H     | -6   | PRO283 PRO284 GLY285 THR286 GLY287 LYS288 SER289 HIS290 ALA316 ASP374 GLN404 ARG443 GLY538 SER539 GLU540 ARG567                                                         |
| Elisapterosin C   | -6.5 | GLY285 THR286 GLY287 LYS288 SER289 HIS290 ALA316 GLU319 LYS320 ARG443 GLY538 SER539 GLU540                                                                              |

|                         |      |                                                                                                                                                                            |
|-------------------------|------|----------------------------------------------------------------------------------------------------------------------------------------------------------------------------|
| Ent-Kaur-16-en-19-ol    | -6.5 | GLY285 THR286 GLY287 LYS288 SER289 ALA316 LYS320 ASP374 GLU375 ARG443 GLY538 GLU540<br>GLY285 THR286 GLY287 LYS288 SER289 ALA313 ALA316 LEU317 ASP374 GLU375 GLN404 ARG443 |
| Erogorgiaene            | -6.2 | GLN537 GLY538<br>PRO283 PRO284 GLY285 THR286 GLY287 LYS288 SER289 ALA313 ALA316 LEU317 ASP374 GLU375                                                                       |
| Furanoguaian-4-ene      | -6.2 | GLN404 ARG443 GLN537 GLY538 ARG56<br>LYS288 ALA312 ALA313 ASP315 ALA316 ASP374 GLU375 GLN404 GLN531 SER535 GLN537 GLY538                                                   |
| Homopseudopteroxazole   | -6.2 | SER539 TYR541<br>ASN179 SER310 HIS311 ALA312 ARG339 VAL340 GLU375 MET378 GLN531 THR532 ASP534 SER535                                                                       |
| Hyperoside              | -6.2 | SER536 GLN537 GLY538 SER539                                                                                                                                                |
| Iso-pseudopterosin E    | -6.2 | SER289 ALA312 ASP315 ALA316 LEU317 GLU319 LYS320 PHE343 ARG443 GLY538 SER539 GLU540<br>PRO283 PRO284 GLY285 THR286 GLY287 LYS288 SER289 ALA316 GLU319 LYS320 ARG443 GLY538 |
| Methoxyamericanolide A  | -6.5 | GLU540                                                                                                                                                                     |
| Methoxyamericanolide B  | -6.7 | GLY285 THR286 GLY287 LYS288 SER289 HIS290 ALA316 GLU319 LYS320 ARG443 GLY538 GLU540                                                                                        |
| Methoxyamericanolide E  | -6.2 | PRO283 PRO284 GLY285 THR286 GLY287 LYS288 SER289 ALA316 LYS320 ARG443 GLY538 GLU540<br>PRO284 GLY285 THR286 GLY287 LYS288 SER289 ALA313 ALA316 LEU317 ASP374 GLU375 GLN404 |
| Methoxyamericanolide G  | -6.7 | ARG443 GLN537 GLY538 GLU540 ARG567<br>PRO283 PRO284 GLY285 THR286 GLY287 LYS288 SER289 HIS290 ALA316 LYS320 ARG443 GLY538 SER539                                           |
| Methoxyamericanolide H  | -6.7 | GLU540<br>PRO283 PRO284 GLY285 THR286 GLY287 LYS288 SER289 HIS290 ALA316 LEU317 LYS320 ARG443                                                                              |
| Methoxyamericanolide I  | -6.2 | GLY538 SER539 GLU540<br>GLY285 GLY287 LYS288 SER289 ALA312 ALA313 ASP315 ALA316 GLU319 ASP374 GLU375 ARG443                                                                |
| O-methylelisabethadione | -6   | GLN537 GLY538 SER539<br>PRO283 PRO284 GLY285 THR286 GLY287 LYS288 SER289 HIS290 SER310 ALA312 ALA313 ALA316                                                                |
| Preclavulone A          | -6.2 | ASP374 GLU375 GLN404 ARG443 GLN537 GLY538 SER539 ARG567<br>SER310 HIS311 ALA312 ALA313 ASP315 ARG339 VAL340 GLU341 GLU375 MET378 GLN531 ASP534                             |
| Pseudopterosin A        | -6.7 | SER535 SER536 GLN537 GLY538                                                                                                                                                |

|                  |      |                                                                                                                                                                                                                                          |
|------------------|------|------------------------------------------------------------------------------------------------------------------------------------------------------------------------------------------------------------------------------------------|
| Pseudopterosin B | -6   | ASN179 CYS309 SER310 HIS311 ALA312 ALA313 GLU375 MET378 ASP383 PRO406 ALA407 GLN531<br>ASP534 SER535 SER536 GLN537 GLY538 SER539<br>PRO283 PRO284 GLY285 THR286 LYS288 SER289 ALA316 GLU319 LYS320 ARG443 GLY538 SER539<br>GLU540 TYR541 |
| Pseudopterosin C | -6.2 | CYS309 SER310 HIS311 ARG339 VAL340 THR359 VAL360 ASN361 GLU375 MET378 THR380 ASP383<br>ALA407 ASP534 SER535 GLN537                                                                                                                       |
| Pseudopterosin E | -6.2 | SER310 HIS311 ALA312 ALA313 ARG339 VAL340 GLU341 GLU375 MET378 LEU405 GLN531 VAL533<br>ASP534 SER535 SER536 GLN537 SER539                                                                                                                |
| Pseudopterosin F | -6.7 | PRO284 GLY285 THR286 LYS288 SER289 ALA312 ALA313 ALA316 LEU317 GLU319 LYS320 ASP374<br>ARG443 GLN537 GLY538 SER539 GLU540                                                                                                                |
| Pseudopterosin H | -6.2 | PRO284 GLY285 LYS288 SER289 ALA312 ALA316 GLU319 ASP374 GLN404 ARG443 GLN537 GLY538<br>SER539 GLU540 ARG567                                                                                                                              |
| Pseudopterosin I | -6.5 | PRO283 PRO284 GLY285 THR286 GLY287 LYS288 SER289 ALA312 ALA313 ALA316 GLU319 ASP374<br>ARG443 GLY538 SER539 GLU540                                                                                                                       |
| Pseudopterosin J | -6.9 | PRO283 PRO284 GLY285 THR286 GLY287 LYS288 SER289 ALA312 ASP315 ALA316 GLU319 LYS320<br>PHE343 ASP374 ARG443 GLY538 SER539 GLU540 ARG567                                                                                                  |
| Pseudopterosin L | -6.2 | PRO283 PRO284 GLY285 THR286 GLY287 LYS288 SER289 HIS290 ALA312 ALA313 ASP315 ALA316<br>LEU317 GLU319 LYS320 ASP374 GLU375 ARG443 GLY538 SER539 GLU540                                                                                    |
| Pseudopterosin M | -6.5 | GLY285 THR286 GLY287 LYS288 SER289 ALA312 ALA313 ASP315 ALA316 GLU319 LYS320 ASP374<br>GLU375 GLN404 ARG443 GLN537 GLY538 SER539 GLU540                                                                                                  |
| Pseudopterosin N | -6   | LYS288 SER310 ALA312 ALA313 ASP315 ALA316 GLU319 GLU341 ASP374 GLU375 GLN404 SER535<br>GLN537 GLY538 SER539                                                                                                                              |
| Pseudopterosin O | -6.5 | SER310 HIS311 ALA312 ALA313 ASP315 ALA316 VAL340 GLU375 MET378 GLN531 ASP534 SER535<br>GLN537 GLY538 SER539                                                                                                                              |
| Pseudopterosin P | -6.2 | ASN179 VAL181 SER310 HIS311 ALA312 ALA313 ALA316 VAL340 GLU341 GLU375 MET378 GLN531<br>THR532 ASP534 SER535 GLN537 GLY538 SER539                                                                                                         |
| Pseudopterosin Q | -6   |                                                                                                                                                                                                                                          |

|                             |      |                                                                                                                                                                     |
|-----------------------------|------|---------------------------------------------------------------------------------------------------------------------------------------------------------------------|
| Pseudopterosin R            | -6.9 | GLY285 THR286 GLY287 LYS288 SER289 HIS290 ALA312 ASP315 ALA316 GLU319 LYS320 ARG443<br>GLY538 SER539 GLU540                                                         |
| Pseudopterosin S            | -6.9 | PRO283 PRO284 GLY285 THR286 GLY287 LYS288 SER289 ALA312 ASP315 ALA316 GLU319 LYS320<br>GLN404 ARG443 GLN537 GLY538 SER539 GLU540 ARG567                             |
| Pseudopterosin W            | -6.7 | PRO283 PRO284 GLY285 THR286 GLY287 LYS288 SER289 ALA312 ALA313 ASP315 ALA316 GLU319<br>LYS320 ASP374 GLU375 GLN404 ARG443 SER535 SER536 GLN537 GLY538 SER539 GLU540 |
| Pseudopterosin X            | -6.5 | ASN179 CYS309 SER310 HIS311 ALA312 ALA313 ASP315 ARG339 VAL340 GLU341 GLU375 MET378<br>PRO406 ALA407 GLN531 ASP534 SER535 SER536 GLN537                             |
| Pseudopterosin Y            | -6.2 | VAL181 CYS309 SER310 HIS311 ALA312 ALA313 ARG339 VAL340 GLU375 MET378 VAL533 ASP534<br>SER535 SER536 GLN537 GLY538                                                  |
| Pseudopterosin Z            | -6.5 | GLY285 THR286 GLY287 LYS288 SER289 HIS290 ALA312 ALA313 ALA316 LYS320 ARG443 GLN537<br>GLY538 SER539 GLU540 TYR541 ARG567                                           |
| Pseudopterosin G-J aglycone | -6.5 | GLY282 PRO283 PRO284 GLY285 THR286 LYS288 SER289 ALA313 ALA316 LEU317 ASP374 GLU375<br>GLN404 ARG443 GLN537 GLY538 ARG567                                           |
| Secogorgosterol             | -6.2 | GLY282 PRO283 PRO284 GLY285 THR286 GLY287 LYS288 SER289 HIS290 ALA312 ASP315 ALA316<br>GLU319 LYS320 ARG443 GLY538 SER539 GLU540                                    |
| Seco-pseudopterosin A       | -6.2 | SER310 HIS311 ALA312 ALA313 ASP315 ALA316 VAL340 GLU341 GLU375 MET378 GLN531 ASP534<br>SER535 SER536 GLN537 GLY538 SER539                                           |
| Seco-pseudopterosin B       | -6.9 | PRO283 PRO284 GLY285 THR286 GLY287 LYS288 SER289 HIS290 ALA312 ALA313 ALA316 LYS320<br>ARG442 ARG443 GLN537 GLY538 SER539 GLU540                                    |
| Seco-pseudopterosin C       | -6.7 | PRO283 PRO284 GLY285 THR286 GLY287 LYS288 SER289 ALA312 ASP315 ALA316 GLU319 LYS320<br>ARG443 GLY538 SER539 GLU540                                                  |
| Seco-pseudopterosin D       | -6.5 | GLY285 GLY287 LYS288 SER289 ALA312 ALA313 ASP315 ALA316 GLU319 LYS320 PHE343 ASP374<br>GLU375 GLN404 ARG443 GLY538 SER539 GLU540                                    |
| Seco-pseudopterosin J       | -6.9 | PRO283 PRO284 GLY285 THR286 GLY287 LYS288 SER289 HIS290 HIS311 ALA312 ASP315 ALA316 GLU319<br>LYS320 ARG443 GLY538 SER539 GLU540                                    |

|                        |      |                                                                                                                                         |
|------------------------|------|-----------------------------------------------------------------------------------------------------------------------------------------|
| Seco-pseudopteroxazole | -6.7 | PRO283 PRO284 GLY285 THR286 GLY287 LYS288 SER289 ALA316 ASP374 GLU375 GLN404 ARG443<br>GLN537 GLY538 SER539 GLU540 ARG567               |
| Sandresolide B         | -6.2 | GLY282 PRO284 GLY285 LYS288 SER289 ALA313 ALA316 LEU317 ASP374 GLU375 SER377 MET378<br>GLY400 ASP401 GLN404 ARG443 GLN537 GLY538 ARG567 |

**Table S7:** Moderate affinity NPs for target nsp13.

| Ligands                | Binding affinity ('-7 to -8.2) | Interacting amino acids                                                                                                                                                                                                        |
|------------------------|--------------------------------|--------------------------------------------------------------------------------------------------------------------------------------------------------------------------------------------------------------------------------|
| 3-epi-Elisabanolide    | -7.5                           | GLY285 THR286 GLY287 LYS288 SER289 HIS290 ALA316 GLU319 LYS320 ASP374 ARG443 GLY538 SER539 GLU540<br>PRO283 GLY285 THR286 GLY287 LYS288 SER289 HIS290 ALA316 LEU317 LYS320 ASP374 GLU375 GLN404 ARG443 GLN537<br>GLY538 ARG567 |
| 4-Acetylamphilectolide | -7.2                           | PRO284 GLY285 LYS288 SER289 ALA316 LEU317 ASP374 GLU375 GLN404 ARG443 GLN537 GLY538 ARG567                                                                                                                                     |
| 10-epi-Americanolide C | -7.2                           | PRO283 PRO284 GLY285 THR286 GLY287 LYS288 SER289 ALA316 GLU319 LYS320 ARG443 GLY538 GLU540                                                                                                                                     |
| Aberrarone             | -7.5                           | PRO284 GLY285 LYS288 SER289 ALA312 ASP315 ALA316 GLU319 LYS320 ASP374 GLU375 GLN404 ARG443 GLN537 GLY538<br>SER539 GLU540 TYR541 ARG567                                                                                        |
| Ameristerenol B        | -7                             | PRO283 PRO284 GLY285 THR286 GLY287 LYS288 SER289 ALA313 ALA316 LEU317 ASP374 GLU375 GLN404 ARG443 GLN537<br>GLY538                                                                                                             |
| Americanolide A        | -7                             | PRO283 PRO284 GLY285 THR286 GLY287 LYS288 SER289 ALA316 ASP374 GLU375 GLN404 ARG443 GLN537 GLY538 SER539<br>GLU540 ARG567                                                                                                      |
| Americanolide B        | -7                             | GLY282 PRO283 PRO284 GLY285 LYS288 SER289 ALA312 ALA313 ASP315 ALA316 LEU317 GLU319 LYS320 ASP374 GLU375<br>GLY400 GLN404 ARG443 GLN537 GLY538 SER539 GLU540 ARG567                                                            |
| Amphilectosin A        | -7.2                           |                                                                                                                                                                                                                                |

|                 |      |                                                                                                                                             |
|-----------------|------|---------------------------------------------------------------------------------------------------------------------------------------------|
| Amphilectosin B | -7.2 | GLY282 PRO284 GLY285 LYS288 SER289 ALA312 ALA313 ASP315 ALA316 LEU317 GLU319 ASP374 GLU375 GLN404 ARG443 GLN537 GLY538 SER539 GLU540 ARG567 |
| Amphilectolide  | -7.5 | PRO284 GLY285 THR286 GLY287 LYS288 SER289 ALA313 ALA316 LEU317 ASP374 GLU375 GLN404 ARG443 GLN537 GLY538 GLU540 ARG567                      |
| Amphiphenalone  | -7   | GLY282 PRO283 PRO284 GLY285 THR286 GLY287 LYS288 SER289 ALA312 ALA313 ALA316 LEU317 ASP374 GLU375 GLN404 ARG443 GLN537 GLY538 ARG567        |
| Colombiasin A   | -7.2 | GLY285 THR286 GLY287 LYS288 SER289 HIS290 LYS320 ASP374 ARG442 ARG443 GLY538 SER539 GLU540                                                  |
| Cumbiasin A     | -7   | PRO283 GLY285 THR286 GLY287 LYS288 SER289 HIS290 ALA316 LYS320 ARG442 ARG443 GLY538 GLU540                                                  |
| Cumbiasin B     | -7   | PRO283 PRO284 GLY285 THR286 GLY287 LYS288 SER289 HIS290 ALA316 LYS320 ARG442 ARG443 GLY538 GLU540                                           |
| CMNPD12142      | -7.7 | PRO284 GLY285 THR286 GLY287 LYS288 SER289 ALA313 ALA316 LEU317 ASP374 GLU375 GLN404 ARG443 GLN537 GLY538 GLU540 ARG567                      |
| CMNPD16186      | -7.7 | PRO283 PRO284 GLY285 THR286 LYS288 SER289 ALA313 ALA316 LEU317 LYS320 ASP374 GLU375 GLN404 ARG443 GLN537 GLY538 ARG567                      |
| CMNPD16187      | -8.2 | PRO283 PRO284 GLY285 THR286 GLY287 LYS288 SER289 SER310 ALA312 ALA313 ASP315 ALA316 GLU319 ASP374 GLU375 ARG443 GLN537 GLY538 SER539 GLU540 |
| Elisabatin A    | -7   | PRO283 PRO284 GLY285 THR286 GLY287 LYS288 SER289 ALA312 ALA313 ALA316 LEU317 LYS320 ASP374 GLU375 GLN404 ARG443 GLN537 GLY538 ARG567        |
| Elisapterosin A | -7.2 | GLY285 THR286 GLY287 LYS288 SER289 HIS290 ALA316 LYS320 ARG443 GLY538 SER539 GLU540                                                         |
| Elisapterosin B | -7   | PRO284 GLY285 THR286 GLY287 LYS288 SER289 HIS290 ALA316 GLU319 LYS320 ASP374 ARG443 GLY538 GLU540                                           |
| Elisapterosin D | -7   | GLY285 THR286 GLY287 LYS288 SER289 HIS290 ALA316 GLU319 LYS320 ARG443 GLY538 SER539 GLU540                                                  |
| Elisapterosin E | -7.5 | PRO283 PRO284 GLY285 THR286 GLY287 LYS288 SER289 HIS290 ALA316 LYS320 ARG443 GLY538 SER539 GLU540 ARG567                                    |
| Elisapterosin F | -7.2 | PRO283 PRO284 GLY285 THR286 GLY287 LYS288 SER289 HIS290 ALA316 LYS320 ARG443 GLY538 SER539 GLU540                                           |
| Ileabethin      | -7.2 | PRO283 PRO284 GLY285 LYS288 SER289 ALA313 ALA316 LEU317 LYS320 ASP374 GLU375 GLN404 ARG443 GLN537 GLY538 ARG567                             |
| Ileabethoxazole | -8.2 | PRO283 PRO284 GLY285 LYS288 SER289 ALA313 ALA316 LEU317 GLU319 ASP374 GLU375 GLN404 ARG443 GLN537 GLY538 SER539 ARG567                      |

|                                       |      |                                                                                                                                                                                                                                                                       |
|---------------------------------------|------|-----------------------------------------------------------------------------------------------------------------------------------------------------------------------------------------------------------------------------------------------------------------------|
| Isoquercitrin                         | -7.5 | GLY285 THR286 GLY287 LYS288 SER289 HIS290 ALA313 ALA316 LEU317 GLU319 LYS320 ASP374 GLU375 ASP401 GLN404 ARG443 GLN537 GLY538 SER539 GLU540<br>PRO284 GLY285 THR286 GLY287 LYS288 SER289 ALA316 LYS320 ASP374 GLU375 SER377 GLN404 ARG443 GLN537 GLY538 SER539 ARG567 |
| Kaempferol                            | -7.2 | GLY285 THR286 GLY287 LYS288 SER289 ALA316 LYS320 ASP374 ARG443 GLY538 GLU540                                                                                                                                                                                          |
| Kaurenoicacid                         | -7   | GLY285 THR286 GLY287 LYS288 SER289 ALA313 ALA316 LEU317 GLU319 ASP374 GLU375 SER377 GLY400 ASP401 GLN404 ARG443 GLN537 GLY538 SER539 GLU540                                                                                                                           |
| O-methyl-nor-elisabethadione          | -7.2 | GLY282 PRO283 PRO284 GLY285 THR286 GLY287 LYS288 SER289 HIS290 ALA313 ALA316 LEU317 ASP374 GLU375 ILE376 SER377 ILE399 GLY400 ASP401 GLN404 ARG443 GLN537 GLY538 GLU540 ARG567                                                                                        |
| Pseudopterosin K                      | -7.5 | GLY285 THR286 GLY287 LYS288 SER289 HIS290 ALA313 ALA316 GLU319 LYS320 ASP374 GLU375 ILE399 GLN404 ARG443 GLN537 GLY538 SER539 GLU540                                                                                                                                  |
| Pseudopterosin T                      | -8   | GLY282 GLY285 THR286 GLY287 LYS288 SER289 ALA313 ALA316 GLU319 LYS320 ASP374 GLU375 SER377 MET378 ILE399 GLY400 ASP401 GLN404 LEU405 ARG443 GLN537 GLY538 SER539 GLU540                                                                                               |
| Pseudopterosin U                      | -7.9 | PRO283 PRO284 GLY285 THR286 GLY287 LYS288 SER289 ALA312 ALA316 GLU319 LYS320 GLN404 ARG443 GLY538 SER539 GLU540 TYR541 ARG567                                                                                                                                         |
| Pseudopterosin V                      | -7   | PRO283 PRO284 GLY285 LYS288 SER289 ALA313 ALA316 LEU317 ASP374 GLU375 GLN404 ARG443 GLN537 GLY538 ARG567                                                                                                                                                              |
| Pseudopteroxazole                     | -7   | GLY282 PRO284 GLY285 LYS288 SER289 ALA313 ALA316 LEU317 GLU319 LYS320 ASP374 GLU375 GLN404 ARG443 GLN537 GLY538 GLU540 ARG567                                                                                                                                         |
| Quercetin                             | -7.2 | GLY282 PRO283 PRO284 GLY285 THR286 GLY287 LYS288 SER289 HIS290 ALA313 ALA316 LEU317 GLU319 ASP374 GLU375 ILE399 LEU438 ARG443 GLY538 GLU540                                                                                                                           |
| Quercetin3-O-beta-D-arabinofuranoside | -7.5 | PRO283 PRO284 GLY285 THR286 GLY287 LYS288 SER289 HIS290 ALA312 ALA313 ALA316 GLU319 LYS320 ARG443 SER535 GLN537 GLY538 SER539 GLU540 ARG567                                                                                                                           |
| Seco-pseudopterosin E                 | -7.7 | PRO283 PRO284 GLY285 THR286 GLY287 LYS288 SER289 ALA312 ASP315 ALA316 GLU319 LYS320 GLU341 CYS342 PHE343 ASP344 ARG443 GLY538 SER539 GLU540 ARG567                                                                                                                    |
| Seco-pseudopterosin F                 | -7   | GLY285 GLY287 LYS288 SER289 ALA312 ASP315 ALA316 GLU319 LYS320 GLU341 CYS342 PHE343 ASP374 GLU375 GLN404 ARG443 GLN537 GLY538 SER539 GLU540                                                                                                                           |
| Seco-pseudopterosin G                 | -7.5 |                                                                                                                                                                                                                                                                       |

|                       |      |                                                                                                                                                                            |
|-----------------------|------|----------------------------------------------------------------------------------------------------------------------------------------------------------------------------|
| Seco-pseudopterosin H | -7.9 | PRO283 PRO284 GLY285 THR286 GLY287 LYS288 SER289 ALA316 GLU319 LYS320 ASP374 GLU375 ILE376 SER377 ILE399<br>GLY400 ASP401 GLN404 ARG443 GLN537 GLY538 SER539 GLU540 ARG567 |
| Seco-pseudopterosin I | -7.2 | PRO283 PRO284 GLY285 LYS288 SER289 ALA313 ALA316 LEU317 GLU319 ASP374 GLU375 GLY400 GLN404 ARG443 GLN537<br>GLY538 SER539 GLU540 ARG567                                    |
| Seco-pseudopterosin K | -8   | PRO284 GLY285 THR286 GLY287 LYS288 SER289 HIS290 ALA312 ALA313 ALA316 LYS320 ASP374 GLU375 GLN404 ARG443<br>SER535 GLN537 GLY538 SER539 GLU540 ARG567                      |
| Sandresolide C        | -7   | GLY282 PRO284 GLY285 LYS288 SER289 HIS290 ALA313 ALA316 LEU317 ASP374 GLU375 ILE376 SER377 GLY400 ASP401<br>GLN404 ARG443 GLN537 GLY538 SER539 ARG567                      |
| Taxifolin             | -7   | PRO284 GLY285 THR286 GLY287 LYS288 SER289 ALA313 ALA316 LYS320 ASP374 GLU375 SER377 GLY400 ASP401 GLN404<br>ARG443 GLN537 GLY538 SER539 ARG567                             |

Table S8: High affinity NPs for target nsp13.

| Ligands                                    | Binding affinity ('-6.5 to -7.9) | Interacting amino acids                                                                                                                 |
|--------------------------------------------|----------------------------------|-----------------------------------------------------------------------------------------------------------------------------------------|
| 1-monoacetate                              | -7.5                             | TRP292 ASN306 CYS309 ARG310 TRP385 ASN386 ASN388 PHE401 TYR420 ASN422 LYS423 HIS424 PHE426 THR428<br>PHE506                             |
| 5-Hydroperoxyicosa-2,4,6,8-tetraenoic acid | -6.7                             | PHE286 VAL290 TRP292 ASN306 ARG310 GLY333 PRO335 ASP352 TRP385 ASN386 ASN388 PHE401 TYR420 ASN422<br>ALA425 PHE426 HIS427 THR428 PHE506 |
| 8-epi-Methoxyamericanolide A               | -7.7                             | VAL287 LYS288 ARG289 VAL290 TRP292 GLY333 PRO335 ASP352 ALA353 GLN354 ASN386 CYS387 ASN388 PHE426<br>HIS427                             |
| 10-epi-Methoxyamericanolide A              | -7.7                             | TRP292 ASN306 ARG310 GLY333 ASN334 PRO335 LYS336 TRP385 ASN386 ASN422 LYS423 HIS424 PHE426                                              |
| Americanolide E                            | -7.5                             | VAL287 VAL290 TRP292 GLY333 PRO335 ASP352 ALA353 TRP385 ASN386 CYS387 ASN388 PHE426 HIS427                                              |
| Americanolide F                            | -7.7                             | VAL290 TRP292 ASN306 ARG310 GLY333 PRO335 ASP352 TRP385 ASN386 PHE401 TYR420 ASN422 PHE426 PHE506                                       |
| (+)-alpha-Terpineol                        | -6.5                             | ASN306 CYS309 ASN386 ASN388 PHE401 TYR420 ASN422 PHE426 THR428 PHE506                                                                   |
| (+)-Aristolone                             | -7.2                             | TRP292 ILE305 ASN306 CYS309 ARG310 TRP385 ASN386 TYR420 ASN422 LYS423 PHE426 PHE506                                                     |
| (-)-beta-Chamigrene                        | -7                               | ILE305 ASN306 CYS309 ARG310 ASN386 TYR420 ASN422 LYS423 HIS424 PHE426 PHE506                                                            |
| beta-Eudesmol                              | -7.5                             | TRP292 ASN306 ARG310 GLY333 PRO335 TRP385 ASN386 CYS387 TYR420 ASN422 PHE426 PHE506                                                     |
| beta-Selinene                              | -7.7                             | ILE305 ASN306 ARG310 ASN386 ASN388 PHE401 TYR420 ASN422 LYS423 PHE426 THR428 PHE506                                                     |



|                              |      |                                                                                                                                                                                                                                       |
|------------------------------|------|---------------------------------------------------------------------------------------------------------------------------------------------------------------------------------------------------------------------------------------|
| β-gorgonene                  | -7.2 | TRP292 ASN306 CYS309 ARG310 TRP385 ASN386 TYR420 ASN422 HIS424 PHE426 PHE506                                                                                                                                                          |
| Bicyclogermacrene            | -7   | TRP292 ASN306 CYS309 ARG310 GLY333 TRP385 ASN386 TYR420 ASN422 PHE426 PHE506                                                                                                                                                          |
| Calarene                     | -6.7 | TRP292 ILE305 ASN306 CYS309 ARG310 TRP385 ASN386 TYR420 ASN422 LYS423 HIS424 PHE426 PHE506                                                                                                                                            |
| Cyperene                     | -7.5 | TRP292 ASN306 CYS309 ARG310 TRP385 ASN386 TYR420 ASN422 HIS424 PHE426 PHE506                                                                                                                                                          |
| Curcuhydroquinone            | -7.2 | TRP292 ASN306 CYS309 ARG310 LYS336 ASN386 ASN388 PHE401 TYR420 ASN422 LYS423 HIS424 PHE426 THR428<br>PHE506                                                                                                                           |
| (-)-Curcuquinone             | -7.7 | ASN306 ARG310 ASN386 ASN388 PHE401 TYR420 ASN422 LYS423 HIS424 PHE426 THR428 PHE506<br>VAL287 LYS288 ARG289 VAL290 TRP292 GLY333 PRO335 ASP352 ALA353 GLN354 PHE367 ASN386 CYS387 ASN388<br>PHE426                                    |
| Ent-Kaur-16-en-19-ol         | -7.7 | TRP292 ASN306 ARG310 LYS336 TRP385 ASN386 TYR420 ASN422 LYS423 HIS424 PHE426 PHE506                                                                                                                                                   |
| Elisabethin C                | -6.7 | PHE286 VAL287 LYS288 ARG289 VAL290 TRP292 GLY333 PRO335 ASP352 ALA353 PHE367 ASN386 CYS387 ASN388<br>VAL389 PHE426 HIS427 THR428 PRO429                                                                                               |
| Elisabethin D                | -7.7 | PHE286 VAL287 LYS288 ARG289 VAL290 TRP292 GLY333 PRO335 ASP352 ALA353 GLN354 TRP385 ASN386 CYS387<br>ASN388 PHE426 HIS427                                                                                                             |
| Elisabethin F                | -7.9 | TRP292 ASN306 CYS309 ARG310 GLY333 ASN334 PRO335 LYS336 TRP385 ASN386 TYR420 ASN422 LYS423 HIS424<br>PHE426 PHE506                                                                                                                    |
| Elisabethin G                | -7.2 | TRP292 ASN306 ARG310 GLY333 PRO335 TRP385 ASN386 CYS387 PHE401 TYR420 ASN422 LYS423 HIS424 PHE426<br>PHE506                                                                                                                           |
| Elisabethin H                | -7.2 | TRP292 ASN306 ARG310 TRP385 ASN386 PHE401 TYR420 ASN422 LYS423 PHE426 PHE506                                                                                                                                                          |
| Furanogermacrene             | -7.5 | TRP292 ILE305 ASN306 CYS309 ARG310 TRP385 ASN386 TYR420 ASN422 LYS423 PHE426 PHE506                                                                                                                                                   |
| Furanotriene                 | -7.2 | TRP292 ASN306 ARG310 TRP385 ASN386 TYR420 ASN422 LYS423 HIS424 PHE426 PHE506                                                                                                                                                          |
| Gamma-Maaliene               | -7.5 | TRP292 ASN306 CYS309 ARG310 TRP385 ASN386 ASN388 PHE401 TYR420 ASN422 PHE426 PHE506                                                                                                                                                   |
| Germacrene D                 | -7   | VAL290 TRP292 ASN306 CYS309 ARG310 ASP352 ALA353 GLN354 TRP385 ASN386 TYR420 ASN422 PHE426 PHE506                                                                                                                                     |
| Ichthyothereol acetate       | -7.2 | VAL287 ARG289 VAL290 TRP292 GLY333 PRO335 ASP352 ALA353 GLN354 LEU366 PHE367 TYR368 CYS387 HIS427<br>LYS288 ARG289 VAL290 TRP292 GLY333 PRO335 ASP352 ALA353 GLN354 LEU366 PHE367 TYR368 TRP385 ASN386<br>CYS387 ASN388 VAL389 PHE426 |
| Isofuranotriene              | -6.9 | TRP292 ASN306 CYS309 ARG310 GLY333 TRP385 ASN386 ASN388 TYR420 ASN422 HIS424 PHE426 PHE506                                                                                                                                            |
| Kaurane-16,18-diol18-acetate | -7.9 |                                                                                                                                                                                                                                       |
| Methoxyamericanolide A       | -7.5 |                                                                                                                                                                                                                                       |

|                |      |                                                                                                                                         |
|----------------|------|-----------------------------------------------------------------------------------------------------------------------------------------|
| Preclavulone A | -7.2 | TRP292 ASN306 ARG310 GLN313 GLY333 ASN334 PRO335 TRP385 ASN386 CYS387 ASN388 PHE401 TYR420 ASN422<br>LYS423 HIS424 PHE426 THR428 PHE506 |
|----------------|------|-----------------------------------------------------------------------------------------------------------------------------------------|

Table S9: Medium affinity NPs for target nsp14.

| Ligands                                                                                      | Binding affinity ('-8.0 to -9.9) | Interacting amino acids                                                                                                                        |
|----------------------------------------------------------------------------------------------|----------------------------------|------------------------------------------------------------------------------------------------------------------------------------------------|
| 1 $\beta$ ,3 $\beta$ -dihydroxy-5 $\alpha$ ,6 $\alpha$ -epoxy-9-oxo-9,11-secogorgostan-11-ol | -9                               | VAL287 ARG289 VAL290 TRP292 ARG310 GLY333 ASN334 PRO335 ASP352 PHE367 TRP385 ASN386<br>CYS387 ASN388 TYR420 PHE426 HIS427 THR428 PRO429 PHE506 |
| 3 $\beta$ -Hydroxy-5 $\alpha$ ,6 $\alpha$ -epoxy-9-oxo-9,11-secogorgostan-11-ol              | -8.2                             | VAL287 LYS288 ARG289 VAL290 TRP292 ARG310 GLY333 PRO335 ASP352 ALA353 GLN354 PHE367<br>TRP385 ASN386 CYS387 ASN388 PHE426 HIS427 PRO429        |
| 3-O-Methylquercetin                                                                          | -8.9                             | GLU302 ASN306 ARG310 TRP385 ASN386 ASN388 PHE401 TYR420 ASN422 LYS423 HIS424 PHE426<br>HIS427 THR428 PHE506                                    |
| 3-epi-Elisabanolide                                                                          | -8.5                             | LYS288 VAL290 TRP292 GLY333 PRO335 ASP352 ALA353 GLN354 PHE367 TYR368 ASN386 CYS387<br>ASN388 VAL389 PHE426 HIS427                             |
| 4-Acetylamphilectolide                                                                       | -9.7                             | TRP292 ASN306 CYS309 ARG310 TRP385 ASN386 ASN388 PHE401 TYR420 ASN422 LYS423 HIS424<br>PHE426 PHE506                                           |
| 7-Hydroxyerogorgiaene                                                                        | -9                               | VAL290 TRP292 ASN306 ARG310 TRP385 ASN386 ASN388 PHE401 TYR420 ASN422 LYS423 HIS424<br>PHE426 HIS427 THR428 PHE506                             |
| 7-Hydroxyerogorgiaenone                                                                      | -8.7                             | TRP292 ASN306 CYS309 ARG310 TRP385 ASN386 ASN388 PHE401 TYR420 ASN422 LYS423 HIS424<br>PHE426 THR428 PHE506                                    |
| 7,14-erogorgiaenediol                                                                        | -8.7                             | TRP292 ASN306 ARG310 TRP385 ASN386 ASN388 PHE401 TYR420 ASN422 LYS423 HIS424 PHE426<br>HIS427 THR428 PHE506                                    |
| 8-epi-Americanolide C                                                                        | -9                               | TRP292 ASN306 ARG310 TRP385 ASN386 ASN388 PHE401 TYR420 ASN422 PHE426 HIS427 THR428<br>PHE506                                                  |
| 10-epi-Americanolide C                                                                       | -8.2                             | TRP292 ASN306 CYS309 ARG310 TRP385 ASN386 TYR420 ASN422 PHE426 PHE506                                                                          |
| 12-Acetoxypseudopterolide                                                                    | -8.2                             | LYS288 ARG289 VAL290 TRP292 GLY333 PRO335 ASP352 ALA353 GLN354 LEU366 PHE367 ASN386<br>CYS387 ASN388 VAL389 PHE426 HIS427 THR428 PRO429        |

|                                              |      |                                                                                                                                                           |
|----------------------------------------------|------|-----------------------------------------------------------------------------------------------------------------------------------------------------------|
| 15alpha-(Angeloyloxy)kaura-16-ene-18-oicacid | -8.2 | VAL287 LYS288 ARG289 VAL290 TRP292 GLY333 ASN334 PRO335 ASP352 ALA353 GLN354 PHE367 TRP385 ASN386 CYS387 ASN388 PHE426 HIS427 PRO429                      |
| Aberrarone                                   | -8.5 | VAL287 LYS288 ARG289 VAL290 TRP292 GLY333 PRO335 ASP352 ALA353 GLN354 PHE367 TRP385 ASN386 CYS387 ASN388 PHE426 HIS427                                    |
| Ameristerenol A                              | -9.5 | VAL287 VAL290 TRP292 ASN306 ARG310 GLY333 PRO335 ASP352 ALA353 PHE367 TRP385 ASN386 CYS387 ASN388 VAL389 TYR420 ASN422 PHE426 HIS427 PRO429 PHE506        |
| Ameristerenol B                              | -9.5 | PHE286 VAL287 LYS288 ARG289 VAL290 TRP292 ARG310 GLY333 ASN334 PRO335 ASP352 ALA353 PHE367 TRP385 ASN386 CYS387 ASN388 VAL389 TYR420 PHE426 HIS427 PHE506 |
| Americanolide A                              | -8   | ARG289 VAL290 TRP292 GLY333 PRO335 ASP352 ALA353 GLN354 ASN386 CYS387 ASN388 PHE426 HIS427                                                                |
| Americanolide B                              | -8   | TRP292 ILE305 ASN306 CYS309 ARG310 TRP385 ASN386 TYR420 ASN422 PHE426 PHE506                                                                              |
| Americanolide C                              | -8   | TRP292 ASN306 CYS309 ARG310 GLY333 TRP385 ASN386 CYS387 TYR420 PHE426 PHE506                                                                              |
| Americanolide D                              | -8.2 | TRP292 ASN306 CYS309 ARG310 GLN313 GLY333 PRO335 TRP385 ASN386 ASN388 TYR420 ASN422 PHE426 PHE506                                                         |
| Amphilectolide                               | -9.2 | VAL290 TRP292 ARG310 GLY333 PRO335 ASP352 TRP385 ASN386 ASN388 PHE401 TYR420 PHE426 THR428 PHE506                                                         |
| Amphiphenalone                               | -9   | VAL290 TRP292 ASN306 ARG310 GLY333 PRO335 TRP385 ASN386 CYS387 ASN388 PHE401 TYR420 ASN422 HIS424 PHE426 PHE506                                           |
| Bis-7-hydroxyerogorgiaene                    | -9.5 | VAL290 TRP292 LEU303 ASN306 ALA307 CYS309 ARG310 GLY333 PRO335 ASP352 ALA353 GLN354 TRP385 ASN386 CYS387 TYR420 ASN422 LYS423 HIS424 PHE426 PHE506        |
| Biformene                                    | -8.7 | TRP292 ILE305 ASN306 ARG310 ASN386 ASN388 PHE401 TYR420 ASN422 LYS423 HIS424 PHE426 THR428 PHE506                                                         |
| Calamenene                                   | -8.2 | TRP292 ASN306 CYS309 ARG310 TRP385 ASN386 ASN388 PHE401 TYR420 ASN422 PHE426 THR428 PHE506                                                                |
| Caridiene                                    | -8.2 | TRP292 ASN306 ARG310 TRP385 ASN386 ASN388 PHE401 TYR420 ASN422 PHE426 THR428 PHE506                                                                       |
| Colombiasin A                                | -8.7 | PHE286 VAL287 LYS288 ARG289 VAL290 TRP292 GLY333 PRO335 ASP352 ALA353 GLN354 PHE367 TYR368 ASN386 CYS387 VAL389 PHE426 HIS427                             |

|             |      |                                                                                                                                                       |
|-------------|------|-------------------------------------------------------------------------------------------------------------------------------------------------------|
| Cumbiasin A | -9   | TRP292 ASN306 CYS309 ARG310 TRP385 ASN386 TYR420 ASN422 LYS423 PHE426 PHE506                                                                          |
| Cumbiasin B | -8   | VAL287 LYS288 ARG289 VAL290 TRP292 GLY333 PRO335 ASP352 ALA353 GLN354 PHE367 TYR368<br>ASN386 CYS387 ASN388 VAL389 PHE426 HIS427 PRO429               |
| Caribenol A | -9   | TRP292 ASN306 CYS309 ARG310 GLY333 TRP385 ASN386 CYS387 TYR420 ASN422 LYS423 HIS424<br>PHE426 PHE506                                                  |
| Caribenol B | -8.7 | TRP292 ASN306 ARG310 GLY333 TRP385 ASN386 ASN388 PHE401 TYR420 ASN422 LYS423 HIS424<br>PHE426 THR428 PHE506                                           |
| CMNPD5089   | -8.7 | TRP292 ASN306 ARG310 TRP385 ASN386 CYS387 ASN388 PHE401 TYR420 ASN422 LYS423 HIS424<br>PHE426 THR428 PHE506                                           |
| CMNPD11416  | -9   | TRP292 ILE305 ASN306 CYS309 ARG310 GLN313 ASP331 GLY333 ASN334 PRO335 ILE338 TRP385<br>ASN386 PHE401 TYR420 ASN422 PHE426 PHE506                      |
| CMNPD12137  | -9.2 | VAL290 TRP292 ASN306 ARG310 GLY333 PRO335 ASP352 TRP385 ASN386 ASN388 TYR420 ASN422<br>PHE426 THR428 PHE506                                           |
| CMNPD12138  | -9   | TRP292 ASN306 CYS309 ARG310 TRP385 ASN386 CYS387 ASN388 PHE401 TYR420 ASN422 LYS423<br>PHE426 HIS427 THR428 PHE506                                    |
| CMNPD12139  | -9.2 | VAL290 TRP292 ILE305 ASN306 CYS309 ARG310 GLY333 PRO335 LYS336 ASP352 TRP385 ASN386<br>CYS387 ASN388 TYR420 ASN422 LYS423 HIS424 PHE426 THR428 PHE506 |
| CMNPD12140  | -9   | LYS288 ARG289 VAL290 TRP292 GLY333 PRO335 ASP352 ALA353 GLN354 LEU366 PHE367 ASN386<br>CYS387 ASN388 PHE426 HIS427                                    |
| CMNPD12142  | -9.5 | VAL290 TRP292 ASN306 CYS309 ARG310 GLY333 PRO335 TRP385 ASN386 CYS387 ASN388 TYR420<br>PHE426 THR428 PHE506                                           |
| CMNPD16184  | -8.2 | ARG289 VAL290 TRP292 GLY333 PRO335 ASP352 ALA353 GLN354 PHE367 TRP385 ASN386 CYS387<br>ASN388 VAL389 PHE426 HIS427 THR428 PRO429                      |
| CMNPD16185  | -9.5 | VAL290 TRP292 ASN306 ARG310 GLY333 ASN334 PRO335 LYS336 ASP352 TRP385 ASN386 ASN388<br>PHE401 TYR420 ASN422 LYS423 PHE426 THR428 PHE506               |
| CMNPD16187  | -9.2 | VAL290 TRP292 ASN306 ARG310 GLY333 PRO335 ASP352 ALA353 TRP385 ASN386 CYS387 ASN388<br>PHE401 TYR420 ASN422 LYS423 HIS424 PHE426 HIS427 THR428 PHE506 |

|                       |      |                                                                                                                                             |
|-----------------------|------|---------------------------------------------------------------------------------------------------------------------------------------------|
| CMNPD17188            | -9   | VAL290 TRP292 ASN306 CYS309 ARG310 TRP385 ASN386 CYS387 ASN388 PHE401 TYR420 ASN422 PHE426 HIS427 THR428 PHE506                             |
| Elisabethol           | -9.2 | VAL290 TRP292 ASN306 ARG310 GLY333 ASN334 PRO335 LYS336 TRP385 ASN386 CYS387 ASN388 PHE401 TYR420 ASN422 PHE426 THR428 PHE506               |
| Elisabanolide         | -8.7 | VAL287 LYS288 ARG289 VAL290 TRP292 GLY333 PRO335 ASP352 ALA353 GLN354 PHE367 ASN386 CYS387 ASN388 VAL389 PHE426 HIS427 PRO429               |
| Elisabethadienol      | -8.5 | TRP292 ILE305 ASN306 ARG310 TRP385 ASN386 ASN388 TYR420 ASN422 LYS423 HIS424 PHE426 PHE506                                                  |
| Elisabethamine        | -8.2 | VAL290 TRP292 ASN306 ARG310 GLY333 PRO335 TRP385 ASN386 CYS387 ASN388 PHE401 TYR420 ASN422 LYS423 HIS424 PHE426 THR428 PHE506               |
| Elisabethatrienol     | -8.5 | TRP292 ILE305 ASN306 CYS309 ARG310 TRP385 ASN386 ASN388 PHE401 TYR420 ASN422 LYS423 HIS424 PHE426 THR428 PHE506                             |
| Elisabethin A         | -8   | VAL287 ARG289 VAL290 TRP292 GLY333 PRO335 ASP352 ALA353 GLN354 PHE367 ASN386 CYS387 ASN388 VAL389 PHE426 HIS427 THR428                      |
| Elisabethin A acetate | -8   | VAL287 LYS288 ARG289 VAL290 TRP292 GLY333 PRO335 ASP352 ALA353 GLN354 LEU366 PHE367 TYR368 ASN386 CYS387 ASN388 VAL389 ASP390 PHE426 HIS427 |
| Elisabethin B         | -8.2 | TRP292 ASN306 CYS309 ARG310 TRP385 ASN386 ASN388 PHE401 TYR420 ASN422 LYS423 HIS424 PHE426 THR428 PHE506                                    |
| Elisabethin D acetate | -9   | VAL287 LYS288 ARG289 VAL290 TRP292 ILE332 GLY333 PRO335 ASP352 ALA353 GLN354 LEU366 PHE367 TYR368 ASN386 CYS387 ASN388 VAL389 PHE426 HIS427 |
| Elisabethin E         | -8   | VAL287 LYS288 ARG289 VAL290 TRP292 GLY333 PRO335 ASP352 ALA353 GLN354 LEU366 PHE367 TYR368 ASN386 CYS387 ASN388 VAL389 PHE426 HIS427        |
| Elisabetholide        | -8   | VAL287 LYS288 ARG289 VAL290 GLY333 PRO335 ASP352 ALA353 GLN354 LEU366 PHE367 TYR368 ASN386 CYS387 ASN388 VAL389 PHE426 HIS427 THR428 PRO429 |
| Elisapterosin B       | -8.2 | VAL287 ARG289 VAL290 TRP292 GLY333 PRO335 ASP352 ALA353 GLN354 PHE367 TRP385 ASN386 CYS387 ASN388 PHE426 HIS427                             |

|                        |      |                                                                                                                                                                                                                   |
|------------------------|------|-------------------------------------------------------------------------------------------------------------------------------------------------------------------------------------------------------------------|
| Elisapterosin C        | -8.2 | VAL287 LYS288 ARG289 VAL290 TRP292 GLY333 PRO335 ASP352 ALA353 GLN354 PHE367 TRP385 ASN386 CYS387 ASN388 VAL389 PHE426 HIS427                                                                                     |
| Elisapterosin D        | -8.9 | VAL287 VAL290 TRP292 GLY333 PRO335 ASP352 ALA353 GLN354 PHE367 TRP385 ASN386 CYS387 ASN388 VAL389 PHE426 HIS427                                                                                                   |
| Elisapterosin E        | -8.5 | VAL287 LYS288 ARG289 VAL290 TRP292 GLY333 ASN334 PRO335 ASP352 ALA353 GLN354 PHE367 ASN386 CYS387 ASN388 VAL389 PHE426 HIS427 THR428 PRO429                                                                       |
| Elisapterosin F        | -8.7 | LYS288 ARG289 VAL290 TRP292 GLY333 ASN334 PRO335 ASP352 ALA353 GLN354 PHE367 TRP385 ASN386 CYS387 ASN388 PHE426 HIS427 THR428 PRO429                                                                              |
| Erogorgiaene           | -9   | TRP292 ASN306 ARG310 TRP385 ASN386 ASN388 PHE401 TYR420 ASN422 LYS423 HIS424 PHE426 THR428 PHE506                                                                                                                 |
| Furanoguaian-4-ene     | -8.5 | TRP292 ASN306 ARG310 GLY333 TRP385 ASN386 CYS387 ASN388 PHE401 TYR420 PHE426 PHE506 VAL287 LYS288 ARG289 VAL290 TRP292 GLY333 ASN334 PRO335 ASP352 ALA353 PHE367 ASN386 CYS387 ASN388 PHE426 HIS427 THR428 PRO429 |
| Grandifloric acid      | -8.2 | VAL290 TRP292 ASN306 ARG310 GLN313 ASP331 GLY333 ASN334 PRO335 TRP385 ASN386 CYS387 ASN388 PHE401 TYR420 ASN422 LYS423 HIS424 PHE426 HIS427 THR428 PHE506                                                         |
| Hyperoside             | -9.7 | VAL290 TRP292 ASN306 CYS309 ARG310 GLN313 ASP331 GLY333 ASN334 PRO335 LYS336 ILE338 ASP352 TRP385 ASN386 CYS387 ASN388 ASN422 LYS423 HIS424 PHE426                                                                |
| Isoquercitrin          | -8.5 | TRP292 ASN306 CYS309 ARG310 GLY333 PRO335 LYS336 ASP352 TRP385 ASN386 ASN388 PHE401 TYR420 ASN422 PHE426 THR428 PHE506                                                                                            |
| Ileabethin             | -9.9 | GLU302 ASN306 ARG310 TRP385 ASN386 ASN388 PHE401 TYR420 ASN422 LYS423 HIS424 PHE426 THR428 PHE506                                                                                                                 |
| Kaempferol             | -9   | VAL287 ARG289 VAL290 TRP292 GLY333 ASN334 PRO335 ASP352 ALA353 GLN354 ASN386 CYS387 ASN388 PHE426 HIS427 THR428 PRO429                                                                                            |
| Kaurenoicacid          | -8   | TRP292 ASN306 ARG310 GLY333 TRP385 ASN386 ASN388 TYR420 ASN422 LYS423 HIS424 PHE426 PHE506                                                                                                                        |
| Methoxyamericanolide B | -8.2 | TRP292 ILE305 ASN306 CYS309 ARG310 GLY333 TRP385 ASN386 ASN388 PHE401 TYR420 ASN422 LYS423 HIS424 PHE426 PHE506                                                                                                   |
| Methoxyamericanolide E | -9.5 | LYS423 HIS424 PHE426 PHE506                                                                                                                                                                                       |

|                              |      |                                                                                                                                                                         |
|------------------------------|------|-------------------------------------------------------------------------------------------------------------------------------------------------------------------------|
| Methoxyamericanolide G       | -9   | TRP292 ILE305 ASN306 CYS309 ARG310 TRP385 ASN386 PHE401 TYR420 ASN422 LYS423 HIS424 PHE426 PHE506                                                                       |
| Methoxyamericanolide H       | -8   | TRP292 ASN306 CYS309 ARG310 GLY333 PRO335 TRP385 ASN386 ASN422 LYS423 HIS424 PHE426 ARG289 VAL290 TRP292 GLY333 PRO335 ASP352 ALA353 GLN354 PHE367 TRP385 ASN386 CYS387 |
| Methoxyamericanolide I       | -8   | ASN388 PHE426 HIS427 TRP292 ASN306 ARG310 GLN313 ASP331 GLY333 ASN334 PRO335 ILE338 TRP385 ASN386 ASN388                                                                |
| O-methylelisabethadione      | -8.7 | PHE401 TYR420 ASN422 PHE426 THR428 PHE506 TRP292 ASN306 ARG310 GLN313 ASP331 GLY333 ASN334 PRO335 ILE338 TRP385 ASN386 CYS387                                           |
| O-methyl-nor-elisabethadione | -8.7 | ASN388 PHE401 TYR420 ASN422 PHE426 THR428 PHE506 VAL290 TRP292 ARG310 GLN313 ASP331 GLY333 ASN334 PRO335 LYS336 ILE338 ASP352 TRP385                                    |
| Pseudopterosin B             | -9.5 | ASN386 CYS387 ASN388 PHE426 HIS427 THR428 VAL290 TRP292 ARG310 GLN313 ASP331 ILE332 GLY333 ASN334 PRO335 LYS336 ILE338 CYS340                                           |
| Pseudopterosin C             | -9.6 | ASP352 LEU383 TRP385 ASN386 CYS387 ASN388 PHE426 HIS427 THR428 VAL290 TRP292 ARG310 GLN313 ASP331 ILE332 GLY333 ASN334 PRO335 ASP352 PHE384 TRP385                      |
| Pseudopterosin F             | -9.8 | ASN386 CYS387 ASN388 TYR420 PHE426 HIS427 THR428 PHE506 ARG289 VAL290 TRP292 ASN306 ILE332 GLY333 ASN334 PRO335 ASP352 ALA353 GLN354 TRP385                             |
| Pseudopterosin H             | -9.8 | ASN386 CYS387 ASN388 PHE401 TYR420 ASN422 ALA425 PHE426 HIS427 THR428 PHE506 ARG289 VAL290 TRP292 ARG310 GLN313 GLY333 ASN334 PRO335 ASP352 ALA353 GLN354 PHE367        |
| Pseudopterosin K             | -9.5 | TRP385 ASN386 CYS387 ASN388 TYR420 PHE426 HIS427 THR428 PHE506 VAL287 LYS288 ARG289 VAL290 TRP292 ASN306 ARG310 GLY333 PRO335 ASP352 ALA353 GLN354                      |
| Pseudopterosin L             | -9   | LEU366 PHE367 TRP385 ASN386 CYS387 ASN388 TYR420 ASN422 PHE426 HIS427 THR428 PHE506 VAL290 TRP292 ARG310 GLN313 GLY333 PRO335 PHE367 TRP385 ASN386 CYS387 ASN388 VAL389 |
| Pseudopterosin V             | -9.9 | PHE401 TYR420 PHE426 HIS427 THR428 PRO429 PHE506 VAL290 TRP292 ARG310 GLN313 GLY333 ASN334 PRO335 TRP385 ASN386 ASN388 PHE401 TYR420                                    |
| Pseudopterosin G-J aglycone  | -9.2 | PHE426 HIS427 THR428 PHE506 VAL290 TRP292 ASN306 ARG310 GLN313 GLY333 PRO335 TRP385 ASN386 CYS387 ASN388 PHE401                                                         |
| Pseudopterosin-MA            | -9   | TYR420 PHE426 HIS427 THR428 PHE506                                                                                                                                      |

|                                       |      |                                                                                                                                                                            |
|---------------------------------------|------|----------------------------------------------------------------------------------------------------------------------------------------------------------------------------|
| Quercetin                             | -9   | GLU302 ASN306 ARG310 TRP385 ASN386 ASN388 PHE401 TYR420 ASN422 LYS423 HIS424 PHE426<br>HIS427 THR428 PHE506                                                                |
| Quercetin3-O-beta-D-arabinofuranoside | -9   | VAL290 TRP292 ASN306 ARG310 GLN313 ASP331 GLY333 ASN334 PRO335 LYS336 ALA337 ASP352<br>TRP385 ASN386 CYS387 ASN388 TYR420 ASN422 PHE426 THR428 PHE506                      |
| Seco-pseudopterosin A                 | -9.7 | VAL290 TRP292 GLY333 PRO335 ASP352 ALA353 GLN354 LEU366 PHE367 TYR368 TRP385 ASN386<br>CYS387 ASN388 VAL389 TYR420 PHE426 HIS427 THR428 PHE506                             |
| Seco-pseudopterosin B                 | -9.8 | VAL287 VAL290 TRP292 GLY333 PRO335 ASP352 ALA353 GLN354 PHE367 TYR368 TRP385 ASN386<br>CYS387 ASN388 VAL389 PHE401 TYR420 PHE426 HIS427 THR428 PRO429 PHE506               |
| Seco-pseudopterosin C                 | -9.7 | VAL290 TRP292 GLY333 PRO335 ASP352 ALA353 PHE367 TYR368 TRP385 ASN386 CYS387 ASN388<br>VAL389 ASP390 TYR420 PHE426 HIS427 THR428 PRO429 PHE506                             |
| Seco-pseudopterosin D                 | -9.7 | VAL287 VAL290 TRP292 ILE332 GLY333 PRO335 ASP352 ALA353 LEU366 PHE367 TYR368 TRP385<br>ASN386 CYS387 ASN388 VAL389 TYR420 PHE426 HIS427 THR428 PRO429 PHE506               |
| Seco-pseudopterosin I                 | -9.7 | VAL290 TRP292 ASN306 ARG310 GLN313 ASP331 ILE332 GLY333 ASN334 PRO335 LYS336 ALA337<br>ILE338 TRP385 ASN386 CYS387 ASN388 PHE401 TYR420 ASN422 PHE426 HIS427 THR428 PHE506 |
| Seco-pseudopterosin J                 | -9.7 | VAL290 TRP292 ASN306 ARG310 GLY333 PRO335 ASP352 ALA353 GLN354 TRP385 ASN386 CYS387<br>ASN388 PHE401 TYR420 ASN422 LYS423 HIS424 PHE426 THR428 PHE506                      |
| Seco-pseudopterosin K                 | -8.2 | TRP292 ASN306 ALA307 CYS309 ARG310 GLN313 ASP331 ILE332 GLY333 ASN334 PRO335 LYS336<br>ILE338 TRP385 ASN386 ASN422 LYS423 HIS424 PHE426                                    |
| Sandresolide A                        | -9   | TRP292 ASN306 CYS309 ARG310 GLY333 PRO335 ASP352 TRP385 ASN386 CYS387 ASN388 TYR420<br>ASN422 PHE426 PHE506                                                                |
| Sandresolide B                        | -8.5 | LYS288 ARG289 VAL290 TRP292 ILE332 GLY333 ASN334 PRO335 ASP352 ALA353 GLN354 PHE367<br>TRP385 ASN386 CYS387 ASN388 PHE426                                                  |
| Secogorgosterol                       | -8.5 | PHE286 VAL287 LYS288 ARG289 VAL290 TRP292 ASN306 CYS309 ARG310 GLY333 PRO335 ASP352<br>PHE367 TRP385 ASN386 CYS387 ASN388 TYR420 PHE426 HIS427 PHE506                      |
| Seco-pseudopteroxazole                | -9.2 | VAL290 TRP292 GLY333 PRO335 ASP352 TRP385 ASN386 CYS387 ASN388 TYR420 PHE426 HIS427<br>THR428 PHE506                                                                       |



|           |      |                                                                                                      |
|-----------|------|------------------------------------------------------------------------------------------------------|
| Taxifolin | -9.2 | ASN306 ARG310 TRP385 ASN386 CYS387 ASN388 PHE401 TYR420 ASN422 LYS423 HIS424 PHE426<br>THR428 PHE506 |
|-----------|------|------------------------------------------------------------------------------------------------------|

**Table S10:** High affinity NPs for target nsp14.

| Ligands               | Binding affinity -10.0 and above | Interacting amino acids                                                                                                                                                                                                 |
|-----------------------|----------------------------------|-------------------------------------------------------------------------------------------------------------------------------------------------------------------------------------------------------------------------|
| Amphilectosin A       | -10.2                            | VAL290 TRP292 ASN306 ARG310 GLN313 ASP331 ILE332 GLY333 ASN334 PRO335 LYS336 ILE338 TRP385 ASN386 ASN388 PHE401<br>TYR420 ASN422 PHE426 HIS427 THR428 PHE506                                                            |
| Amphilectosin B       | -10                              | TRP292 ASN306 ARG310 GLN313 ASP331 ILE332 GLY333 ASN334 PRO335 LYS336 ILE338 TRP385 ASN386 ASN388 PHE401 TYR420<br>ASN422 LYS423 HIS424 PHE426 THR428 PHE506                                                            |
| Amersiterol A         | -10                              | VAL290 TRP292 ARG310 ILE332 GLY333 PRO335 ASP352 ALA353 GLN354 LEU366 PHE367 TYR368 TRP385 ASN386 CYS387<br>ASN388 VAL389 PHE426 HIS427 PRO429                                                                          |
| Cumbiasin C           | -10.2                            | TRP292 ASN306 CYS309 ARG310 GLY333 TRP385 ASN386 PHE401 TYR420 ASN422 LYS423 HIS424 PHE426 PHE506<br>VAL290 TRP292 ASN306 ARG310 GLN313 GLY333 PRO335 TRP385 ASN386 ASN388 PHE401 TYR420 PHE426 HIS427 THR428<br>PHE506 |
| CMNPD16186            | -10.2                            | VAL290 TRP292 ASN306 ARG310 GLN313 GLY333 ASN334 PRO335 TRP385 ASN386 ASN388 PHE401 TYR420 ASN422 PHE426<br>HIS427 THR428 PHE506                                                                                        |
| Elisabatin A          | -10.5                            | VAL290 TRP292 ILE305 ASN306 CYS309 ASN386 ASN388 PHE401 TYR420 ASN422 PHE426 HIS427 THR428 PHE506                                                                                                                       |
| Elisabatin B          | -11.2                            | VAL290 TRP292 ILE305 ASN306 CYS309 GLY333 ASN386 ASN388 PHE401 TYR420 ASN422 PHE426 HIS427 THR428 PHE506                                                                                                                |
| Elisabatin C          | -11.2                            | VAL287 LYS288 ARG289 VAL290 GLY333 PRO335 ASP352 ALA353 GLN354 LEU366 PHE367 ASN386 CYS387 ASN388 VAL389<br>PHE426 HIS427 THR428 PRO429                                                                                 |
| Elisapterosin A       | -10.7                            | PHE286 VAL287 LYS288 ARG289 VAL290 TRP292 ARG310 GLN313 GLY333 ASN334 PRO335 TRP385 ASN386 ASN388 PHE401<br>TYR420 PHE426 HIS427 THR428 PHE506                                                                          |
| Homopseudopteroxazole | -10                              | VAL290 TRP292 ARG310 GLN313 GLY333 ASN334 PRO335 LYS336 ASP352 TRP385 ASN386 ASN388 PHE401 TYR420 PHE426<br>HIS427 THR428 PHE506                                                                                        |
| lLeabethoxazole       | -10.5                            | VAL290 TRP292 ILE305 ASN306 CYS309 ARG310 ILE332 GLY333 ASN334 PRO335 ASP352 ALA353 TRP385 ASN386 CYS387 ASN388<br>TYR420 ASN422 LYS423 HIS424 PHE426 PHE506                                                            |
| Iso-pseudopterosin E  | -10.2                            |                                                                                                                                                                                                                         |

|                  |       |                                                                                                                                                                                                                                                                                               |
|------------------|-------|-----------------------------------------------------------------------------------------------------------------------------------------------------------------------------------------------------------------------------------------------------------------------------------------------|
| Pseudopterosin A | -10   | TRP292 ILE305 ASN306 CYS309 ARG310 GLN313 ASP331 ILE332 GLY333 ASN334 PRO335 LYS336 ILE338 CYS340 LEU383 PHE384<br>TRP385 ASN386 CYS387 TYR420 ASN422 LYS423 HIS424 PHE426 PHE506<br>VAL290 TRP292 ASN306 ALA307 CYS309 ARG310 GLY333 PRO335 ASP352 TRP385 ASN386 CYS387 ASN388 PHE401 TYR420 |
| Pseudopterosin D | -10   | ASN422 LYS423 HIS424 PHE426 HIS427 THR428 PHE506<br>VAL290 TRP292 ASN306 ARG310 GLY333 ASN334 PRO335 ASP352 ALA353 TRP385 ASN386 CYS387 ASN388 ARG400 PHE401                                                                                                                                  |
| Pseudopterosin E | -10   | TYR420 ASN422 PHE426 HIS427 THR428 PHE506<br>VAL290 TRP292 ASN306 GLY333 ASN334 PRO335 ASP352 ALA353 GLN354 TRP385 ASN386 CYS387 ASN388 PHE401 TYR420                                                                                                                                         |
| Pseudopterosin G | -10   | ASN422 LYS423 PHE426 HIS427 THR428 PHE506<br>ARG289 VAL290 TRP292 ASN306 GLY333 ASN334 PRO335 ASP352 ALA353 GLN354 TRP385 ASN386 CYS387 ASN388 PHE401                                                                                                                                         |
| Pseudopterosin I | -10.2 | TYR420 ASN422 LYS423 PHE426 HIS427 THR428 PHE506<br>LYS288 VAL290 TRP292 ASN306 GLY333 ASN334 PRO335 ASP352 ALA353 GLN354 PHE367 TRP385 ASN386 CYS387 ASN388                                                                                                                                  |
| Pseudopterosin J | -10.7 | PHE401 TYR420 ASN422 LYS423 PHE426 HIS427 THR428 PHE506<br>VAL287 VAL290 TRP292 ARG310 GLN313 GLY333 PRO335 ASP352 ALA353 PHE367 TRP385 ASN386 CYS387 ASN388 PHE401                                                                                                                           |
| Pseudopterosin M | -10   | TYR420 PHE426 HIS427 THR428 PRO429 PHE506<br>PHE286 VAL287 LYS288 ARG289 VAL290 TRP292 ARG310 GLY333 ASN334 PRO335 ALA353 PHE367 TRP385 ASN386 CYS387                                                                                                                                         |
| Pseudopterosin N | -11   | ASN388 VAL389 PHE401 TYR420 PHE426 HIS427 THR428 PHE506<br>VAL290 TRP292 ASN306 ARG310 GLN313 ASP331 ILE332 GLY333 ASN334 PRO335 LYS336 ILE338 LEU383 PHE384 TRP385 ASN386                                                                                                                    |
| Pseudopterosin O | -11.2 | CYS387 ASN388 PHE401 TYR420 ASN422 PHE426 HIS427 THR428 PHE506<br>VAL290 TRP292 ASN306 ARG310 GLY333 ASN334 PRO335 LYS336 ASP352 ALA353 GLN354 TRP385 ASN386 CYS387 ASN388                                                                                                                    |
| Pseudopterosin P | -10.2 | ARG400 PHE401 TYR420 ASN422 PHE426 THR428 PHE506<br>VAL290 TRP292 ASN306 ARG310 GLY333 ASN334 PRO335 LYS336 ASP352 ALA353 GLN354 PHE367 TRP385 ASN386 CYS387                                                                                                                                  |
| Pseudopterosin Q | -10.4 | ASN388 ARG400 PHE401 TYR420 ASN422 PHE426 THR428 PHE506<br>PHE286 VAL287 LYS288 ARG289 VAL290 GLY333 ASN334 PRO335 ASP352 ALA353 GLN354 LEU366 PHE367 TYR368 SER369                                                                                                                           |
| Pseudopterosin R | -10.5 | ASN386 CYS387 ASN388 VAL389 ASP390 HIS427 PRO429<br>VAL290 TRP292 ARG310 GLN313 GLY333 ASN334 PRO335 ASP352 ALA353 PHE367 TRP385 ASN386 CYS387 ASN388 PHE401                                                                                                                                  |
| Pseudopterosin S | -10.2 | TYR420 PHE426 HIS427 THR428 PRO429 PHE506                                                                                                                                                                                                                                                     |

|                       |       |                                                                                                                                                                  |
|-----------------------|-------|------------------------------------------------------------------------------------------------------------------------------------------------------------------|
| Pseudopterosin T      | -10   | VAL290 TRP292 ARG310 GLN313 GLY333 ASN334 PRO335 PHE367 TRP385 ASN386 CYS387 ASN388 VAL389 PHE401 TYR420 PHE426 HIS427 THR428 PRO429 PHE506                      |
| Pseudopterosin U      | -10   | VAL290 TRP292 ARG310 GLN313 GLY333 PRO335 ALA353 PHE367 TYR368 TRP385 ASN386 CYS387 ASN388 VAL389 PHE401 TYR420 PHE426 HIS427 THR428 PHE506                      |
| Pseudopterosin W      | -10.7 | LYS288 ARG289 VAL290 TRP292 ARG310 GLY333 ASN334 PRO335 ASP352 ALA353 GLN354 PHE367 TRP385 ASN386 CYS387 ASN388 PHE401 TYR420 PHE426 HIS427 THR428 PHE506        |
| Pseudopterosin X      | -11   | VAL287 VAL290 TRP292 ARG310 GLY333 ASN334 PRO335 ASP352 ALA353 PHE367 TRP385 ASN386 CYS387 ASN388 PHE401 TYR420 PHE426 HIS427 THR428 PRO429 PHE506               |
| Pseudopterosin Y      | -10.7 | VAL287 VAL290 TRP292 ASN306 ARG310 GLY333 ASN334 PRO335 TRP385 ASN386 CYS387 ASN388 PHE401 TYR420 PHE426 HIS427 THR428 PRO429 PHE506                             |
| Pseudopterosin Z      | -11   | VAL290 TRP292 ASN306 ARG310 GLY333 PRO335 ASP352 ALA353 GLN354 LEU366 TRP385 ASN386 CYS387 ASN388 PHE401 TYR420 ASN422 LYS423 HIS424 PHE426 THR428 PHE506        |
| Pseudopteroxazole     | -10.5 | VAL290 TRP292 ARG310 GLN313 GLY333 ASN334 PRO335 TRP385 ASN386 ASN388 PHE401 TYR420 PHE426 HIS427 THR428 PHE506                                                  |
| Pseudopterolide       | -10.2 | VAL290 TRP292 ILE332 GLY333 PRO335 TYR351 ASP352 ALA353 LEU366 PHE367 TYR368 ASN386 CYS387 ASN388 VAL389 PHE426 HIS427 THR428 PRO429                             |
| Seco-pseudopterosin E | -10   | ARG289 VAL290 TRP292 ASN306 ARG310 GLY333 PRO335 ASP352 GLN354 TRP385 ASN386 CYS387 ASN388 PHE401 TYR420 ASN422 LYS423 PHE426 HIS427 THR428 PHE506               |
| Seco-pseudopterosin F | -10   | PHE286 VAL287 VAL290 TRP292 ASN306 ARG310 GLY333 PRO335 ASP352 ALA353 PHE367 TRP385 ASN386 CYS387 ASN388 PHE401 TYR420 ASN422 PHE426 HIS427 THR428 PRO429 PHE506 |
| Seco-pseudopterosin G | -10.2 | VAL290 TRP292 ASN306 ARG310 GLY333 PRO335 ASP352 ALA353 GLN354 LEU366 PHE367 TRP385 ASN386 CYS387 ASN388 PHE401 TYR420 ASN422 LYS423 HIS424 PHE426 THR428 PHE506 |
| Seco-pseudopterosin H | -10   | VAL290 TRP292 ASN306 ARG310 GLN313 ASP331 GLY333 ASN334 PRO335 LYS336 ILE338 TRP385 ASN386 CYS387 ASN388 PHE401 TYR420 ASN422 PHE426 HIS427 THR428 PHE506        |
| Sandresolide C        | 10    | TRP292 ILE305 ASN306 CYS309 ARG310 TRP385 ASN386 ASN388 PHE401 TYR420 ASN422 LYS423 HIS424 PHE426 THR428 PHE506                                                  |

**Table S11:** Very high affinity NPs for target nsp14.

| Top Ligands           | Formulae                                       | SMILES                                                                                                     |
|-----------------------|------------------------------------------------|------------------------------------------------------------------------------------------------------------|
| Amphilectosin A       | C <sub>25</sub> H <sub>36</sub> O <sub>6</sub> | <chem>CC1CCC(C2=C1C(=C(C(=C2)C)OC3C(C(C(CO3)O)O)O)O)C(C)C=CC=C(C)C</chem>                                  |
| Amphilectosin B       | C <sub>25</sub> H <sub>36</sub> O <sub>6</sub> | <chem>CC1CCC(C2=C1C(=C(C(=C2)C)OC3C(C(C(CO3)O)O)O)O)C(C)C=CC=C(C)C</chem>                                  |
| Ameristerenol A       | C <sub>30</sub> H <sub>48</sub> O <sub>2</sub> | <chem>C[C@@H]([C@H]1CC[C@@H]2[C@@]1(CCOC3=C2CC=C4[C@@]3(CC[C@H](C4)O)C)C)[C@H]5CC5(C)[C@H](C)C(C)C</chem>  |
| Ameristerol A         | C <sub>30</sub> H <sub>48</sub> O <sub>3</sub> | <chem>C[C@@H]([C@H]1CC[C@H]([C@]1(C)CCO)[C@@H]2CC=C3C[C@H](CC[C@@]3(C2=O)C)O)[C@H]4CC4(C)C(=C)C(C)C</chem> |
| Elisapterosin A       | C <sub>20</sub> H <sub>28</sub> O <sub>5</sub> | <chem>CC1CCC2C(CC3C24C1(C(=O)C5(C(C3C(O5)(C)C)(C4=O)C)O)O)C</chem>                                         |
| Elisabatin A          | C <sub>20</sub> H <sub>22</sub> O <sub>3</sub> | <chem>CC1CC(C2=C(C(=O)C(=O)C3=C2C1=C(C=C3C)O)C)C=C(C)C</chem>                                              |
| Pseudopterosin A      | C <sub>25</sub> H <sub>36</sub> O <sub>6</sub> | <chem>CC1CCC2C(CC(C3=C(C(=C(C1=C23)OC4C(C(C(CO4)O)O)O)O)C)C=C(C)C)C</chem>                                 |
| Pseudopterosin R      | C <sub>28</sub> H <sub>40</sub> O <sub>7</sub> | <chem>CC1CCC2C(CC(C3=C(C(=C(C1=C23)O)OC4C(C(C(CO4)C)O)OC(=O)C)O)C)C=C(C)C)C</chem>                         |
| Pseudopterolide       | C <sub>21</sub> H <sub>22</sub> O <sub>6</sub> | <chem>CC(=C)C1CC2=C(C=C(O2)C(C3C=C(C4C1O4)C(=O)O3)C(=C)C)C(=O)OC</chem>                                    |
| Pseudopteroxazole     | C <sub>21</sub> H <sub>27</sub> NO             | <chem>CC1CCC2C(CC(C3=C(C4=C(C1=C23)OC=N4)C)C)C=C(C)C)C</chem>                                              |
| Sandresolide B        | C <sub>19</sub> H <sub>28</sub> O <sub>4</sub> | <chem>CC1CCC2C(CC(C(C3(C2=C1C(=O)O3)O)(C)O)C)C=C(C)C)C</chem>                                              |
| Seco-Pseudopterosin A | C <sub>25</sub> H <sub>38</sub> O <sub>6</sub> | <chem>CC1CCC(C2=C1C(=C(C(=C2)C)O)OC3C(C(C(CO3)O)O)O)C(C)CCC=C(C)C</chem>                                   |

Table S12: Smiles line notations for filtered NPs.
